# Supplementary material
Source: PubMed Central journal article supplement (PMC9767678)
Supplement: mmc1.pdf [file mmc1.pdf]

**Immunity, Volume 55**

**Supplemental information**

**Neutralizing monoclonal antibodies elicited  
by mosaic RBD nanoparticles bind conserved  
sarbecovirus epitopes**

**Chengcheng Fan, Alexander A. Cohen, Miso Park, Alfur Fu-Hsin Hung, Jennifer R. Keefe, Priyanthi N.P. Gnanapragasam, Yu E. Lee, Han Gao, Leesa M. Kakutani, Ziyang Wu, Harry Kleanthous, Kathryn E. Malecek, John C. Williams, and Pamela J. Bjorkman**

# Supplemental figures

**A**

|            |                                                                                                                          |     |    |    |    |    |    |    |    |     |     |  |
|------------|--------------------------------------------------------------------------------------------------------------------------|-----|----|----|----|----|----|----|----|-----|-----|--|
|            | 10                                                                                                                       | 20  | 30 | 40 | 50 | 60 | 70 | 80 | 90 | 100 | 110 |  |
| Consensus  | RVSPSTEVVRFNITNLCPFGEVFNATXFPVSVYAWERRKRSNCVADYSLVLSNS-TSFSSTFKCYGVSPTKLNDLCFXKNVYADSEFVVKGDEVQRQIAPGGTGVADIYNYKLPDDFTGC | 114 |    |    |    |    |    |    |    |     |     |  |
| SARS-CoV-2 | ..Q.TESI.....A.....N.....-A.....IR.....K.....                                                                            | 114 |    |    |    |    |    |    |    |     |     |  |
| RShSTT200  | .T.T.Q.....N.R.....T.....R.....K.....M.....                                                                              | 114 |    |    |    |    |    |    |    |     |     |  |
| Pang17     | .Q.TISI.....S.A.....N.....                                                                                               | 114 |    |    |    |    |    |    |    |     |     |  |
| RaTG13     | ..Q.TDSI.....A.....N.....IT.....K.....                                                                                   | 114 |    |    |    |    |    |    |    |     |     |  |
| SARS-CoV   | -----K.....F.....A.....D.....M.....                                                                                      | 102 |    |    |    |    |    |    |    |     |     |  |
| WIV1       | ..A..K.....-.....A.....D.....                                                                                            | 114 |    |    |    |    |    |    |    |     |     |  |
| SHC014     | ..A..K.....-.....A.....D.....L.....                                                                                      | 114 |    |    |    |    |    |    |    |     |     |  |
| LYRa3      | ..R.....-.....AI.....D.....M.....                                                                                        | 114 |    |    |    |    |    |    |    |     |     |  |
| C028       | ..V..GD.....-.....A.....D.....M.....                                                                                     | 114 |    |    |    |    |    |    |    |     |     |  |
| Rs4081     | ..TH.....R..DK...S...N...TK..D...T...S..I...S...T.LIRSS...V..E.....                                                      | 114 |    |    |    |    |    |    |    |     |     |  |
| RmYN02     | ..IL.....F..DK...N...Q.TK..D.I...T...S..I...S...T.LIRFS...E.....                                                         | 114 |    |    |    |    |    |    |    |     |     |  |
| RF1        | ..V.....R..DK...S...TK..D...T.F...N...S..I...S...T.LIRFS...V.....                                                        | 114 |    |    |    |    |    |    |    |     |     |  |
| Yun11      | ..I.....R..DR...S...TK..D...T...S..I...S...T.LIRFS...E.....E.....                                                        | 114 |    |    |    |    |    |    |    |     |     |  |
| BM4831     | ..T.T.....Q...N...I...M..T...SA...Q...S...Y...D...A.....                                                                 | 115 |    |    |    |    |    |    |    |     |     |  |
| BtKY72     | ..Q...S...L...D...A...SS.....S...Y...D...A.....                                                                          | 115 |    |    |    |    |    |    |    |     |     |  |
| Khosta2    | ..LD.....M..I..DQ...K.....V..D..S.T...SA.....G...Y...H.H.....SE.V.....                                                   | 115 |    |    |    |    |    |    |    |     |     |  |

  

|            |                                                                                                           |     |     |     |     |     |     |     |     |     |     |  |
|------------|-----------------------------------------------------------------------------------------------------------|-----|-----|-----|-----|-----|-----|-----|-----|-----|-----|--|
|            | 120                                                                                                       | 130 | 140 | 150 | 160 | 170 | 180 | 190 | 200 | 210 | 220 |  |
| Consensus  | VJAWNTRNIDAG--GX-NYYRFRHGKLPFERDISNVPYSPGGKPCX-XXGLNCYXPLSYGYFYPTVGVGYPYRNVVLSFELLNAPATVCGPKLSTDLVKXKCVNF | 219 |     |     |     |     |     |     |     |     |     |  |
| SARS-CoV-2 | ...SN.L.SKVG..Y..L...KSN.....TEI.QA.ST...G..F.....Q...Q.N.....H.....K.N.....                              | 219 |     |     |     |     |     |     |     |     |     |  |
| RShSTT200  | ...SISL...--GS...KSV.....TQL.QA.D...PD...Q..Y.QS.N.....K.H.V.....                                         | 214 |     |     |     |     |     |     |     |     |     |  |
| Pang17     | ...SVKQ..LTG..YG.L...KS.....TEI.QA.ST...G.....E..H.T.N..F.....G.....T..D.....                             | 223 |     |     |     |     |     |     |     |     |     |  |
| RaTG13     | ...SKH...KEG..F.L...KAN.....TEI.QA.S...G.....Y.....D..H.....K.N.....                                      | 223 |     |     |     |     |     |     |     |     |     |  |
| SARS-CoV   | ...TST..Y.K.L...R.....F..D...-A.....N.....T.T.I.....                                                      | 193 |     |     |     |     |     |     |     |     |     |  |
| WIV1       | ...TQT..Y.K.L...R.....F..D...-AF...N...I.N.I.....I.....                                                   | 222 |     |     |     |     |     |     |     |     |     |  |
| SHC014     | ...NSK.SSTS..Y..L...V.RS..N.Y..L..DI...QS...P...R...FT.A.H.....I.....                                     | 218 |     |     |     |     |     |     |     |     |     |  |
| LYRa3      | ...TSS..FH.K.L...R.....F..D...-AF...N...T.N.I.....I.....                                                  | 218 |     |     |     |     |     |     |     |     |     |  |
| C028       | ...TST..Y.K.L...R.....F..D...-AF...R...T.S.I.....I.....                                                   | 218 |     |     |     |     |     |     |     |     |     |  |
| Rs4081     | ...AKQ.Q...-Q...S.KT...LTSDE-----GV.T...D..N.PIE..AT.....A.....                                           | 204 |     |     |     |     |     |     |     |     |     |  |
| RmYN02     | ...AQQ.I...-S.F..H.AV...L.SDE-----GV.T...D.N.N.PLD..AT.....Q.....                                         | 204 |     |     |     |     |     |     |     |     |     |  |
| RF1        | ...AKQ.V...-S.F..H.SS...L.SEE-----GV.T...D.NQN.PLE..AT.....S.....                                         | 204 |     |     |     |     |     |     |     |     |     |  |
| Yun11      | ...A.Q.R...-Q...S.KT...L.SDE-----GV.T...D..S.PLE..AT.....S.I.....                                         | 204 |     |     |     |     |     |     |     |     |     |  |
| BM4831     | ...NSL.S--SN--EFF...I..YG..L..LFN.S.GT.A...A...TQSS.I.F.....Q..E.....                                     | 219 |     |     |     |     |     |     |     |     |     |  |
| BtKY72     | ...NSV.SKSGN--F.....I..Y...L.NSA.GT.S..Q.G...K...T.....K.E.....                                           | 222 |     |     |     |     |     |     |     |     |     |  |
| Khosta2    | I.....T..SK--R--GF.....NIR.Y..T...NAA.GT.Q..TH...Q...TS.S...F.....Q.....                                  | 220 |     |     |     |     |     |     |     |     |     |  |

**B**

|            | RShSTT200 | Pang17 | RaTG13 | SARS-CoV | WIV1 | SHC014 | LYRa3 | C028 | Rs4081 | RmYN02 | RF1  | Yun11 | BM4831 | BtKY72 | Khosta2 |
|------------|-----------|--------|--------|----------|------|--------|-------|------|--------|--------|------|-------|--------|--------|---------|
| SARS-CoV-2 | 83.1      | 86.3   | 90.0   | 73.7     | 74.9 | 75.3   | 72.6  | 73.5 | 63.0   | 62.1   | 63.9 | 63.0  | 70.0   | 72.7   | 67.7    |
| RShSTT200  | 78.5      | 81.3   | 72.5   | 72.5     | 72.9 | 72.9   | 72.5  | 63.6 | 63.1   | 65.0   | 63.6 | 69.7  | 72.1   | 66.8   |         |
| Pang17     | 87.9      | 75.8   | 74.9   | 75.8     | 72.6 | 74.4   | 65.0  | 62.8 | 65.0   | 64.1   | 68.3 | 71.9  | 67.0   |        |         |
| RaTG13     | 75.8      | 76.2   | 75.3   | 74.4     | 74.9 | 63.7   | 62.3  | 63.7 | 63.2   | 68.8   | 72.3 | 67.4  |        |        |         |
| SARS-CoV   | 95.3      | 80.8   | 94.8   | 96.9     | 61.1 | 61.1   | 61.7  | 62.2 | 71.8   | 73.8   | 70.3 |       |        |        |         |
| WIV1       | 83.9      | 95.4   | 94.5   | 64.9     | 64.4 | 65.3   | 66.2  | 73.2 | 75.0   | 72.3   |      |       |        |        |         |
| SHC014     | 82.1      | 83.5   | 62.4   | 62.8     | 63.8 | 63.8   | 73.6  | 75.0 | 69.1   |        |      |       |        |        |         |
| LYRa3      | 93.6      | 63.8   | 62.8   | 64.2     | 65.1 | 71.8   | 73.6  | 71.4 |        |        |      |       |        |        |         |
| C028       | 62.8      | 62.4   | 63.3   | 64.2     | 72.3 | 74.1   | 72.3  |      |        |        |      |       |        |        |         |
| Rs4081     | 88.2      | 89.7   | 92.6   | 61.8     | 64.4 | 60.0   |       |      |        |        |      |       |        |        |         |
| RmYN02     | 89.7      | 88.2   | 61.4   | 64.0     | 60.0 |        |       |      |        |        |      |       |        |        |         |
| RF1        | 89.2      | 64.1   | 64.4   | 60.5     |      |        |       |      |        |        |      |       |        |        |         |
| Yun11      | 61.8      | 65.3   | 61.4   |          |      |        |       |      |        |        |      |       |        |        |         |
| BM4831     | 82.0      | 73.8   |        |          |      |        |       |      |        |        |      |       |        |        |         |
| BtKY72     | 79.3      |        |        |          |      |        |       |      |        |        |      |       |        |        |         |

**C**

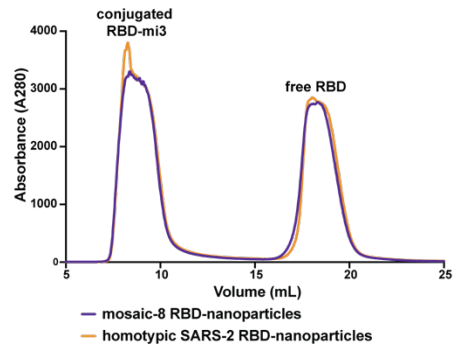

**D**

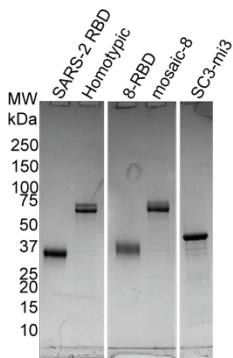

**E**

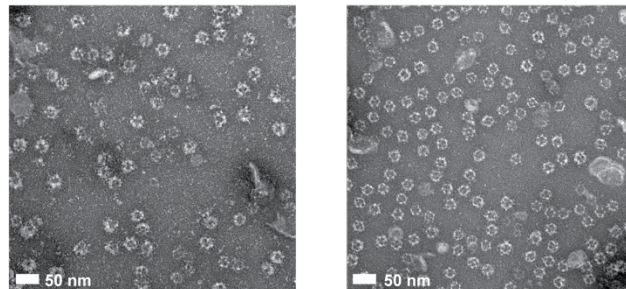

Figure S1. Sarbecovirus RBDs and construction of RBD-nanoparticles. Related to Figure 1.

(A) Sequence alignment of RBDs from 16 sarbecoviruses. (B) Pairwise sequence identities (%) relating the RBDs in panel A. (C) SEC profile showing separation of conjugated SpyCatcher003-mi3 nanoparticles from free RBDs. RBDs were added at a 2-fold molar excess over SpyCatcher003-mi3 subunits. (D) Reducing SDS-PAGE analysis of free RBD, purified conjugated RBD-nanoparticles, and unconjugated SpyCatcher-mi3 nanoparticles. (E) Negative stain EM of conjugated nanoparticles. Left: mosaic-8 RBD-nanoparticles. Right: homotypic SARS-CoV-2 RBD-nanoparticles.

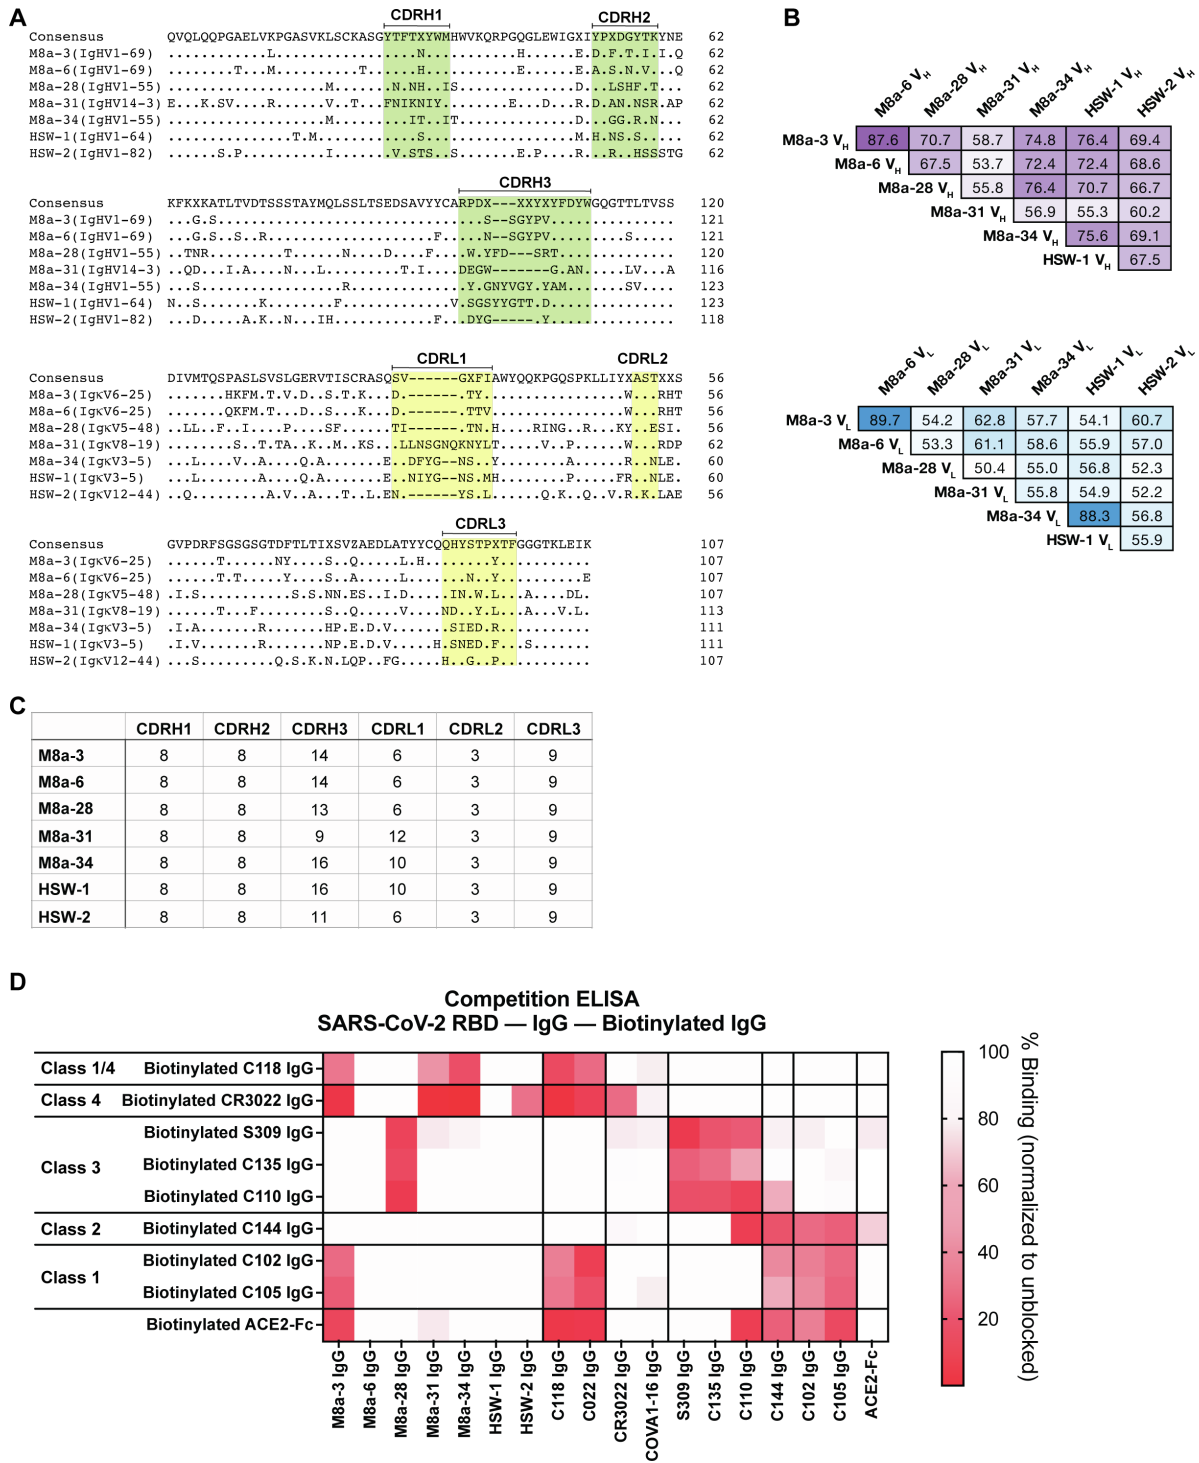

sequence identities (%) between  $V_H$  and  $V_L$  domains in (A). (C) Number of residues in CDRs. (D) Competition ELISA experiment in which a test set of biotinylated IgGs of known epitopes or human ACE2-Fc (y-axis) were assayed for binding to SARS-CoV-2 RBD in the presence of unlabeled M8a, HSW, control IgGs, or ACE2-Fc (x-axis). The heat map shows shades of red indicating the percent binding of the tested IgGs or ACE2-Fc in the presence of competitor. M8a-3, M8a-31, M8a-34, and HSW-2 IgGs competed with biotinylated class 1/4 and/or class 4 anti-RBD, with HSW-2 competing with the biotinylated class 4 antibody only. M8a-3 IgG competed with biotinylated class 1 antibodies and ACE2-Fc in addition to the biotinylated class 1/4 and class 4 antibodies. M8a-28 IgG competed with biotinylated class 3 antibodies. M8a-6 and HSW-1 IgGs showed no competition in this assay.

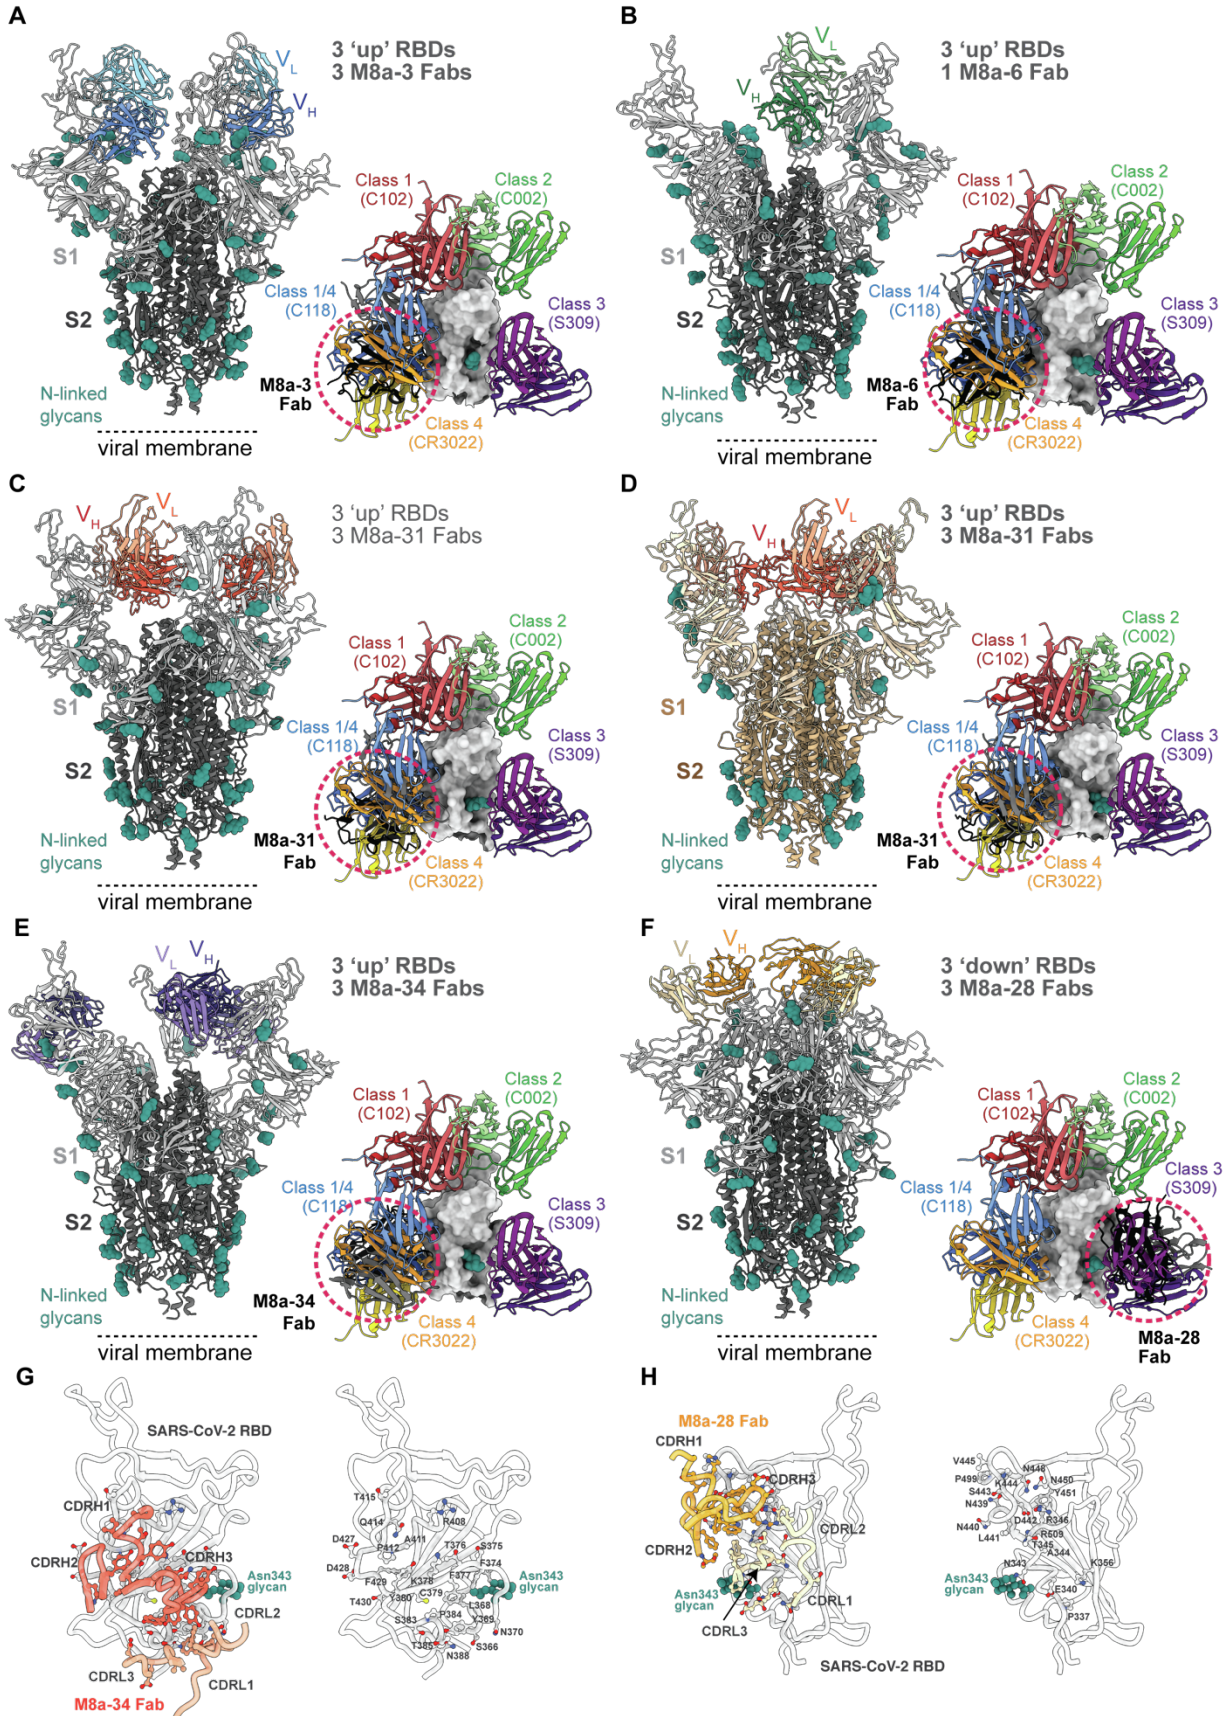

**Figure S3. Structural analysis of mAbs isolated from mice immunized with mosaic-8 nanoparticles. Related to Figure 3.**

Cartoon representations of single particle cryo-EM structures of Fab-spike trimer complexes are shown from the side (left) with a comparison of binding epitopes of the Fab with representative anti-RBD antibodies: class 1 (C102, PDB 7K8M), class 2 (C002, PDB 7K8T), class 3 (S309, PDB 7JX3), class 4 (CR3022, PDB 7LOP), and class 1/4 (C118, PDB 7RKV)) aligned on an RBD in surface representation (right). Only  $V_H$ - $V_L$  domains are shown for each Fab. Fabs of interests (colored in black and circled with a red dotted line) and the anti-RBD antibodies used for classification are aligned on a surface representation of the RBD. N-linked glycans are shown as teal spheres. (A) WA1 spike complexed with M8a-3. (B) SARS-CoV-2 WA1 spike complexed with M8a-6. (C) WA1 spike complexed with M8a-31. (D) Omicron BA.1 spike complexed with M8a-31. (E) WA1 spike complexed with M8a-34. (F) WA1 spike complexed with M8a-28. Left: interactions between SARS-CoV-2 RBD and the CDRs of (G) M8a-28 Fab and (H) M8a-34 Fab. Right: SARS-CoV-2 RBD residues involved in interactions with (G) M8a-28 Fab and (H) M8a-34 Fab.

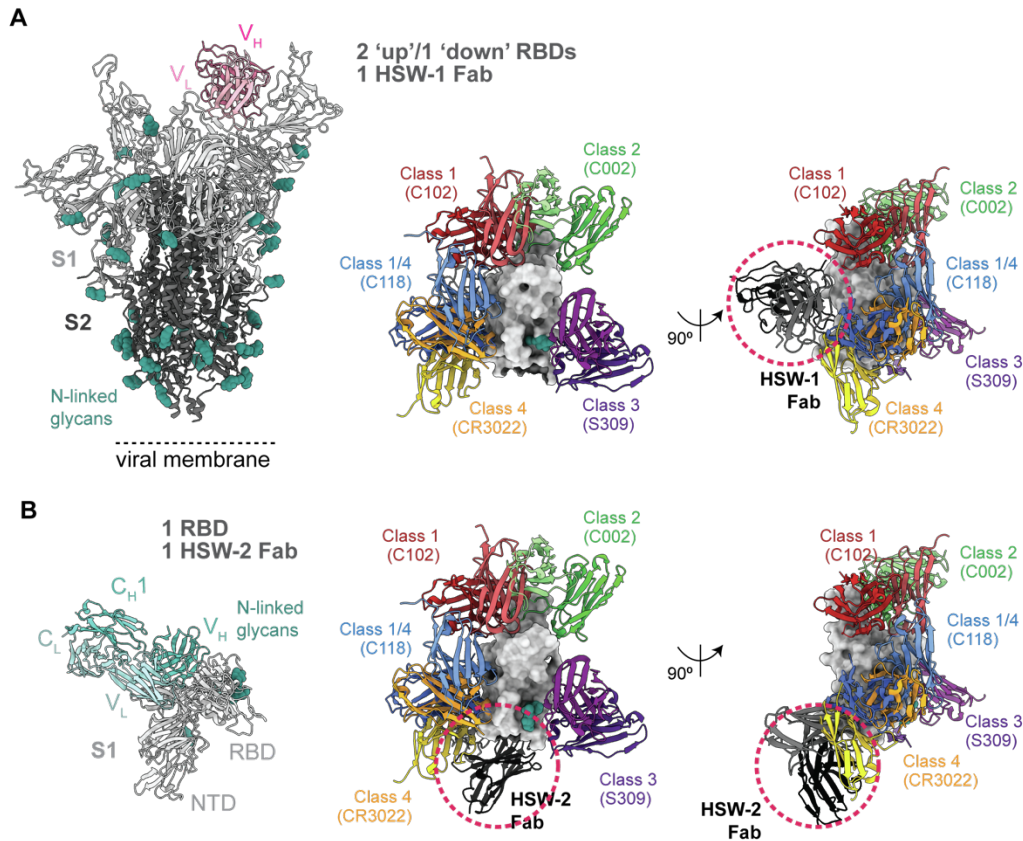

**Figure S4. Structural analysis of mAbs isolated from mice immunized with homotypic nanoparticles. Related to Figure 4.**

Cartoon representations of single particle cryo-EM structures of Fab-spike trimer complexes are shown from the side (left) with a comparison of binding epitopes of the Fab with representative anti-RBD antibodies: class 1 (C102, PDB 7K8M), class 2 (C002, PDB 7K8T), class 3 (S309, PDB 7JX3), class 4 (CR3022, PDB 7LOP) and class 1/4 (C118, PDB 7RKV)) aligned on an RBD in surface representation (middle and right). Only  $V_H$ - $V_L$  domains are shown for each Fab. Fabs of interests (colored in black and circled with a red dotted line) and the anti-RBD antibodies used for classification are aligned on a surface representation of the RBD. N-linked glycans are shown as teal spheres. (A) SARS-CoV-2 WA1 spike complexed with HSW-1. (B) WA1 spike S1 domain complexed with HSW-2.



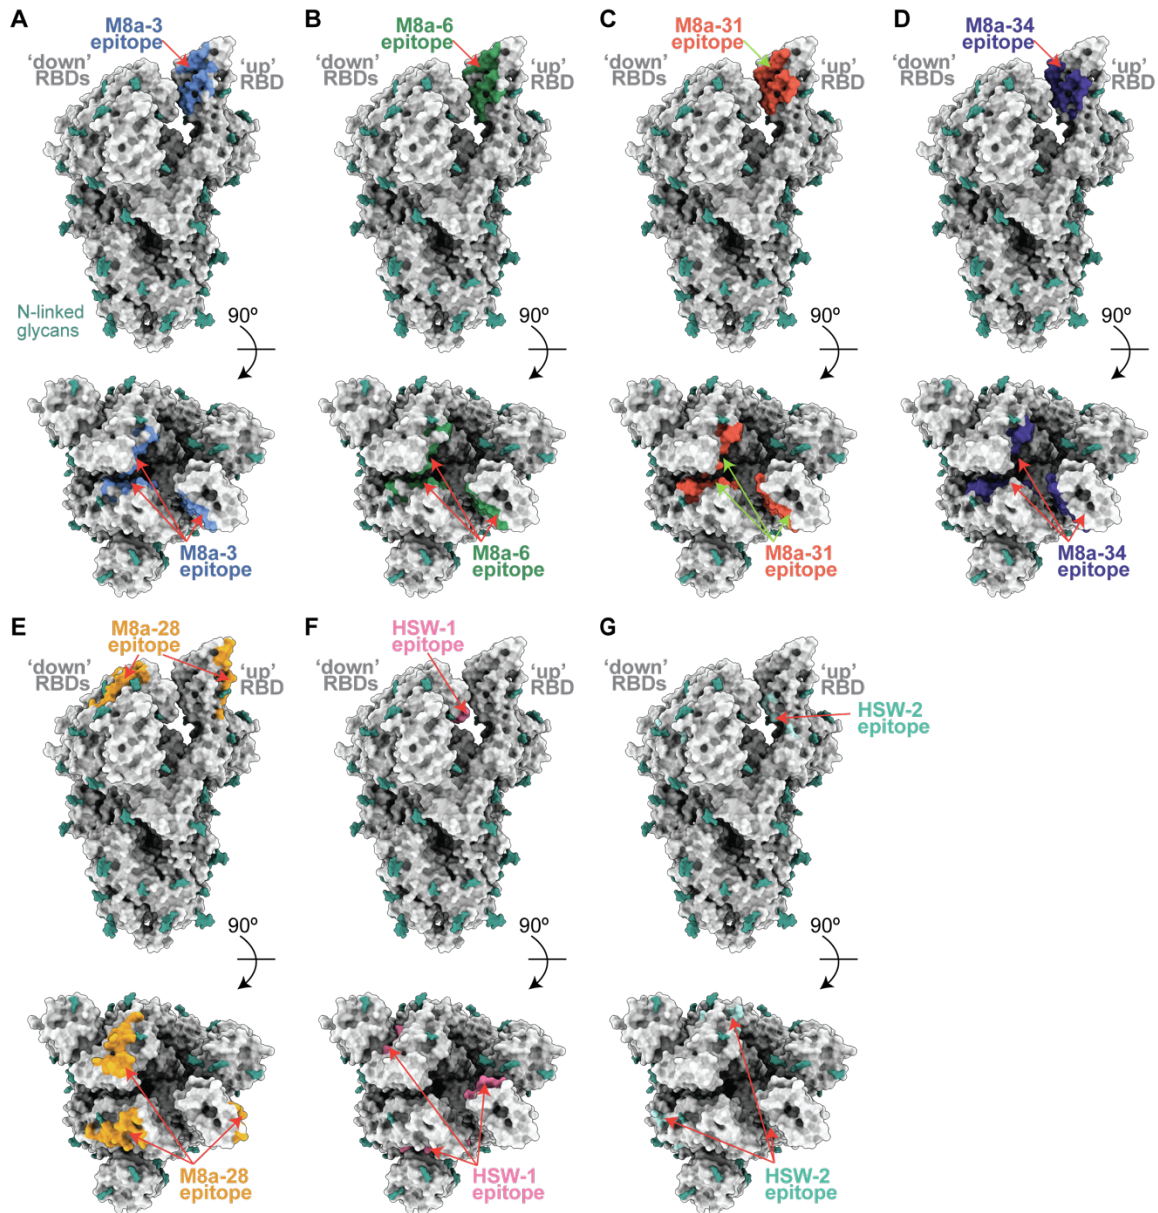

**Figure S5. Epitopes of mAbs mapped on a unliganded SARS-CoV-2 spike trimer. Related to Figure 5 and 6.**

Binding epitopes for all mAbs were identified by PDBePISA [S2] and then mapped on to a unliganded spike trimer with two ‘down’ and one ‘up’ RBDs (PDB 6VYB). The spike trimer is shown as a surface representation with N-linked glycans shown as teal spheres. The epitopes of (A) M8a-3, (B) M8a-6, (C) M8a-31 and (D) M8a-34 are blocked in the ‘down’ RBD conformation, but accessible in an ‘up’ RBD conformation. (E) The epitope of M8a-28 is accessible in both ‘down’ and ‘up’ RBD conformations. (F) The epitope of HSW-1 is blocked in the ‘down’ RBD

conformation, but accessible in an 'up' RBD conformation. (G) The epitope of HSW-2 is blocked in both 'down' and 'up' RBD conformations.

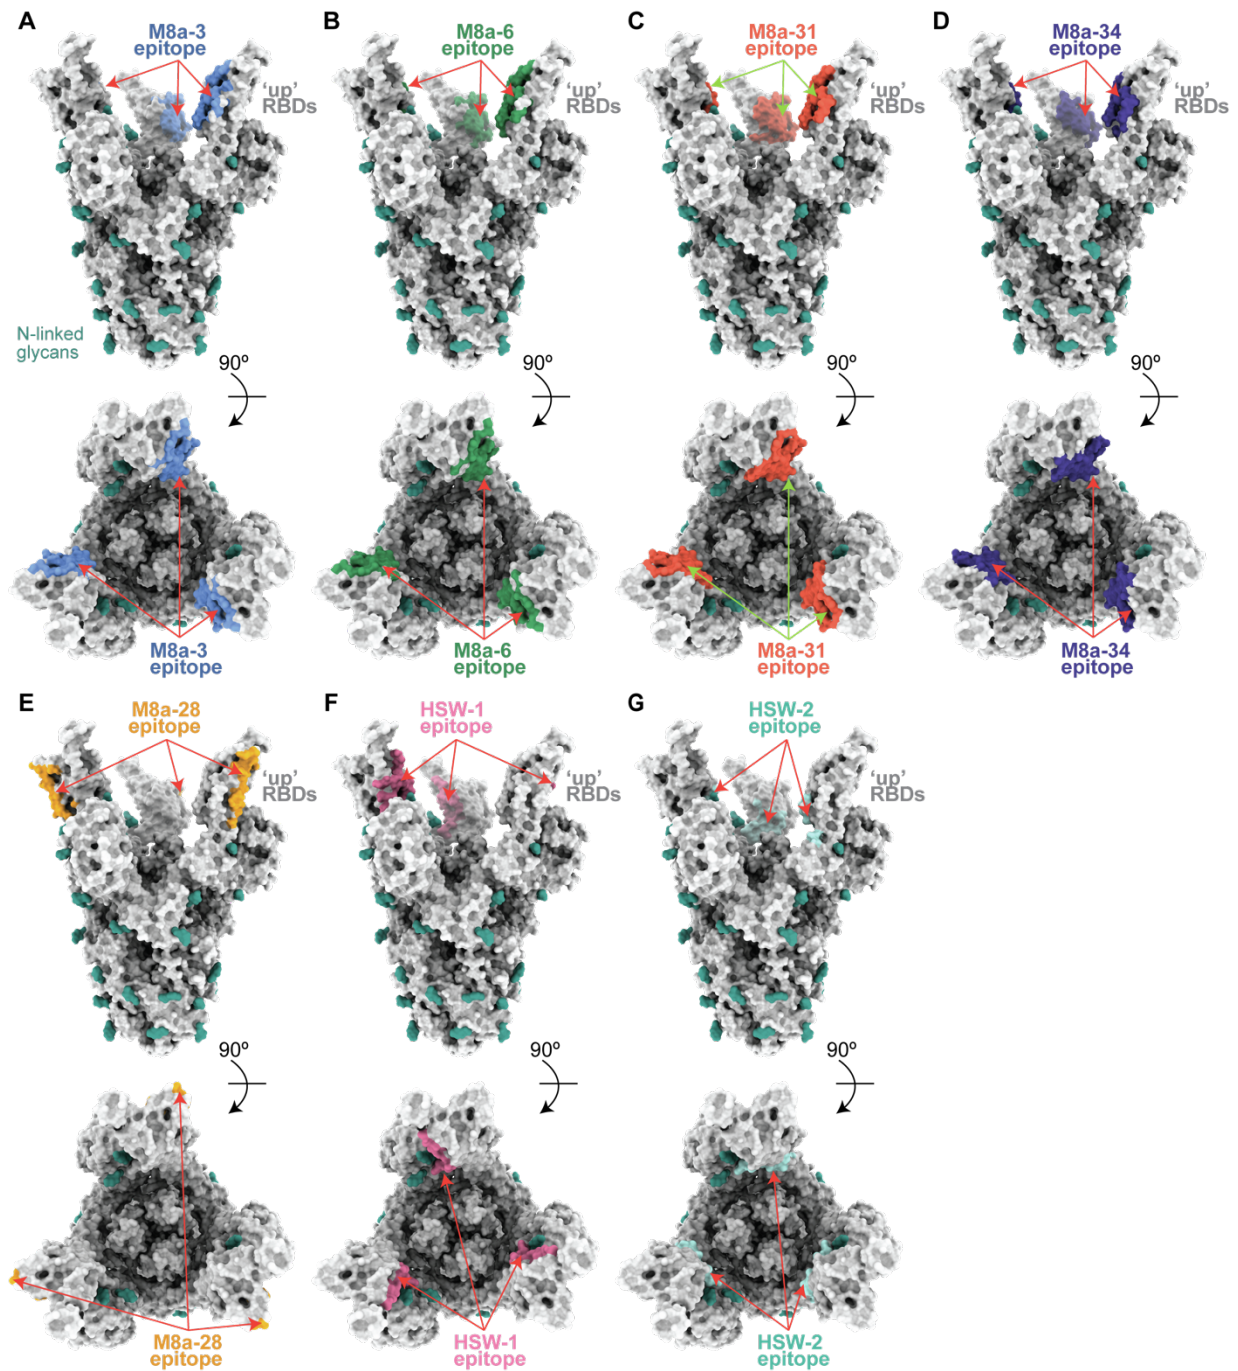

**Figure S6. Epitopes of mAbs mapped on a SARS-CoV-2 spike trimer with all ‘up’ RBDs. Related to Figure 5 and 6.**

Binding epitopes for all mAbs were identified by PDBePISA [S2] and then mapped on to a spike trimer with three ‘up’ RBDs (PDB 7RKV; Fabs not shown). The spike trimer is shown as a surface representation with N-linked glycans shown as teal spheres. The epitopes of (A) M8a-3, (B) M8a-6, (C) M8a-31, and (D) M8a-34 are all accessible in an ‘up’ RBD conformation. (E) The epitope

of M8a-28 is accessible in 'up' RBD conformation. (F) The epitope of HSW-1 is accessible in an 'up' RBD conformation. (G) The epitope of HSW-2 is sterically hindered in an 'up' RBD conformation.

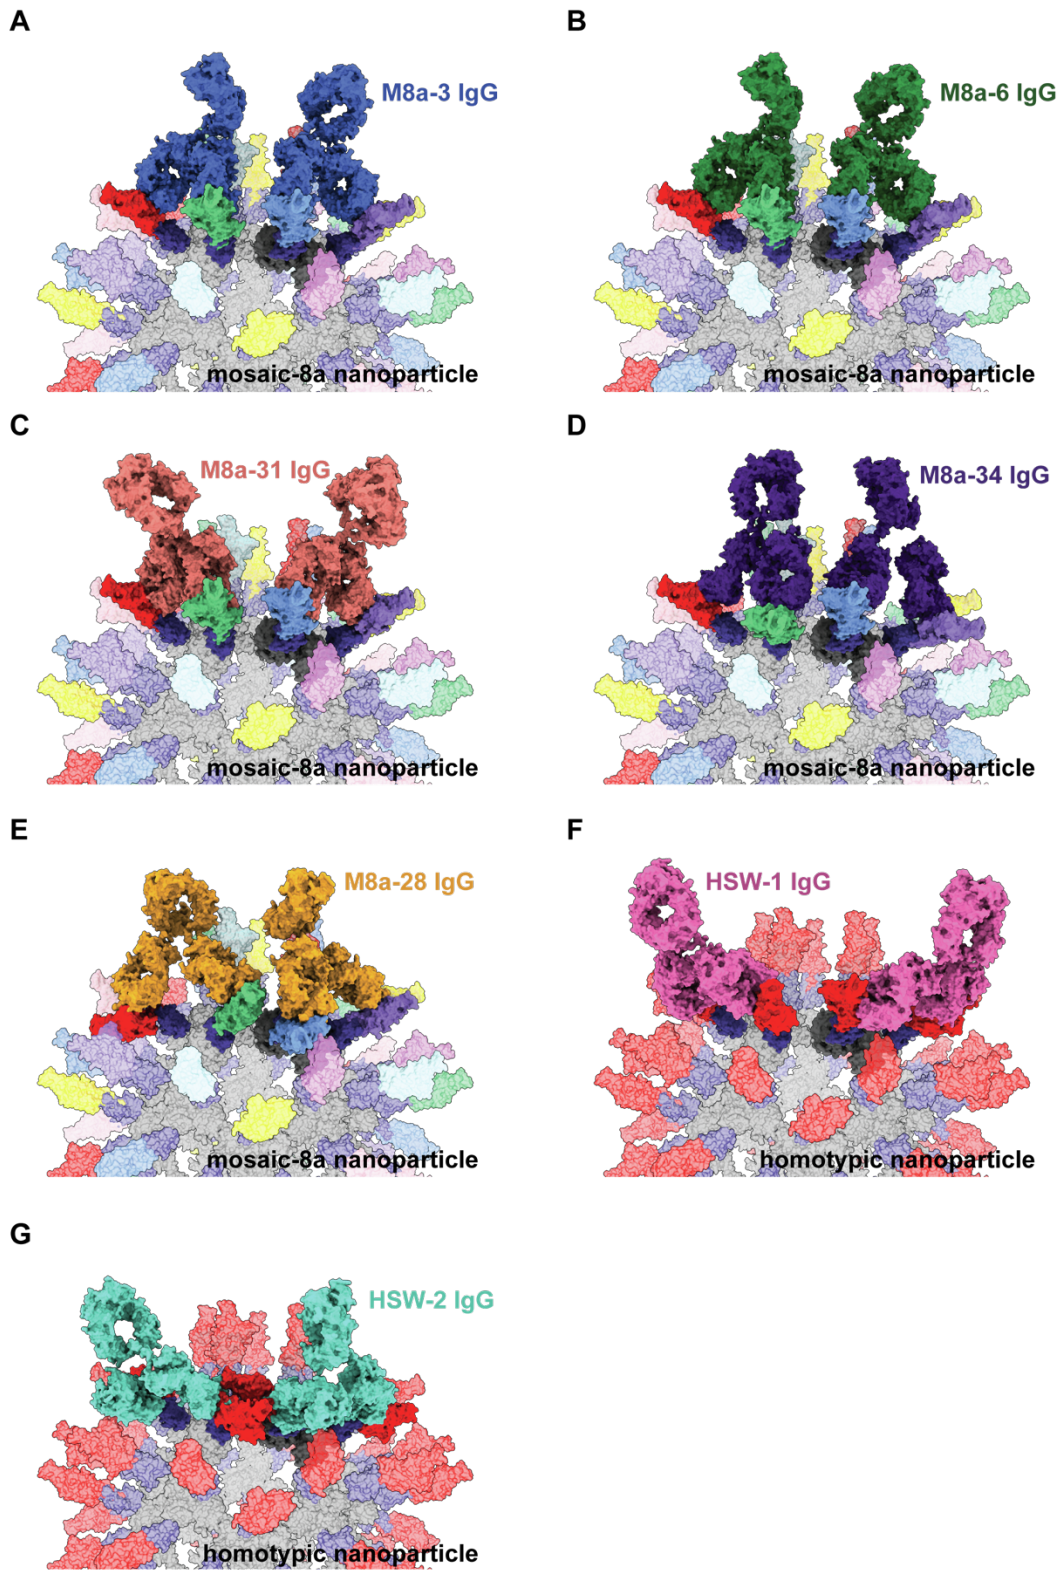

**Figure S7. Models of M8a and HSW IgGs binding to adjacent RBDs on SpyCatcher-mi3 nanoparticles. Related to Figure 6.**

Structural models of RBD-nanoparticles formed by SpyCatcher-mi3 and SpyTagged RBDs were made using coordinates of an RBD (PDB 7SC1) (represented in different colors for mosaic-8 nanoparticles, with two adjacent RBDs in red and blue, or in red for homotypic nanoparticles), mi3 (PDB 7B3Y) (gray), and SpyCatcher (PDB 4MLI) (dark blue). IgGs (various colors) were modeled using the coordinates of each mAb Fab based on an intact IgG crystal structure (PDB 1HZH), and the RBD binding epitope of each Fab in a modeled IgGs was determined based on the Fab-spike structures reported in this study. The two Fabs of each IgGs were positioned with distances between the C-termini of the Fab C<sub>H1</sub> domains to be less than 65 Å, as described previously [S1]. Both the IgG Fc hinge and the linker region between a SpyTagged RBD and SpyCatcher were assumed to be flexible and adjusted accordingly. Models are shown for (A) M8a-3 IgG interacting with adjacent RBDs on a mosaic-8 RBD-nanoparticle. (B) M8a-6 IgG interacting with adjacent RBDs on a mosaic-8 RBD-nanoparticle. (C) M8a-31 IgG interacting with adjacent RBDs on a mosaic-8 RBD-nanoparticle. (D) M8a-34 IgG interacting with adjacent RBDs on a mosaic-8 RBD-nanoparticle. (E) M8a-28 IgG interacting with adjacent RBDs on a mosaic-8 RBD-nanoparticle. (F) HSW-1 IgG interacting with adjacent RBDs on a homotypic RBD-nanoparticle. (G) HSW-2 IgG interacting with adjacent RBDs on a homotypic RBD-nanoparticle.

## Supplemental Tables

| mAbs   | V <sub>H</sub> (sequences)                                                                                                             | V <sub>L</sub> (sequences)                                                                                               | Lineages              |
|--------|----------------------------------------------------------------------------------------------------------------------------------------|--------------------------------------------------------------------------------------------------------------------------|-----------------------|
| M8a-3  | QVQLQQPGAELVLPASVVKLSCKASGYTFNTYWMHWKQRP<br>HGLEWIGEIDPFDYTIKINQKFKGKSTLTVDTSSSTAYMQLS<br>SLTSEDSAVYYCARPDSSGYPVYFDYWGQGTTLTVSS        | DIVMTQSHKFMSTSVGDRVSIITCKASQDVGTIYIAWYQQKPGQ<br>SPKLLIYWASTRHTGVPDRFTGSGSGTNYTLTISSVQAEDLA<br>LYHCQQHYSTPYTFGGGKLEIK     | IgHV1-69<br>IgcV6-25  |
| M8a-6  | QVQLQQPGTELVMPGASVVKLSCKTSGYTFTHYWMHWKQRP<br>EGLEWIGEIAPSDNYKYNQKFKGKSTLSDRSTAYMQLS<br>SLTSEDSAVYYFCARPDSSGYPVYFDYWGQGTTLTVSS          | DIVMTQSQKFMSTSLGDRVSIISCKASQDVGTTVAWYQQKPGQ<br>SPKLLIYWASTRHTGVPDRFTGSGSDYTLTISSVAAEDLA<br>LYYCCQHYNTPYTFGGGKLEIE        | IgHV1-69<br>IgcV6-25  |
| M8a-7  | QAYLQQSGAEMVRPGASVKMSCKASGYTFNNYMHVWQTPS<br>QGLEWIGGFYPGNDTAYSQKFKGKATLTVDKSSSTAFMHL<br>SLTSEDSAVYYFCARSLGRYYAMDYWGQGTSTVTVSS          | DIVLTQSPASLAVSLGQRATISCRASESVDDFGISYMNWFQ<br>KPGQTPKLLIYGASNQSGVPRFSGSGSDTDFSLNIHPMEE<br>DDPAMYFCQQSKEVPYTFGGGKLEIK      | IgHV1-12<br>IgcV3-2   |
| M8a-9  | QVQLQQPGAELVLRPGSSVVKLSCKASGYTFYSYIHWVQRPI<br>EGPEWIGMIDPDSGNHFNQNFKDKATLTVDKSSNTAYMQLS<br>SLTTEDSAVYYCARGSGSTYRGYFDYWGHTTLTVSS        | DIQMTQSSSYLSVSLGGRVTITCKASDHNNWLAWYQQKPGN<br>TPRLIISGATNLETGVPDRFSGSGSKDYTLSTLQTEDVA<br>TYCCQQYWSPLTFGAGTKLELK           | IgHV1-52<br>IgcV13-85 |
| M8a-11 | EVQLQQSGPELVKPGASVKIPCKASGYTFDYNMHWKQSH<br>KSLEWIGEIDPNNGDTIYNQKFKGKASLTVDKSSSTAYMELR<br>SLTSEDTAVYYCAKRGYGSLLWYFDVWGTGTTVTVSS         | DIQMTQSSSSFSVSLGDRVTITCKASEDIYIRLAWYQQRP<br>APRLIISNAISLETGVPDRFSGSGSKDYTLSTLQTEDVA<br>TYCCQQYWSPTWTFGGGKLEIK            | IgHV1-18<br>IgcV13-84 |
| M8a-15 | QVQLQQSGPELARPGASVVKLSCRASGYTFVFLSWMKQRTG<br>QGLEWIGEIYPTSKNTYNDKFRKATLTADKSSSTAYMELR<br>SLTSEDSAVYYFCVLYDYFDYWGQGTTLTVSS              | QIVLTQSPAISASPEKVTISCSASSSVSYMYWYQQKGTSS<br>PKPWIYRTSNLAGVPRFSGSGSGTYSYSLTISSMEADAAT<br>YYCCQQYQSPRTFGGGKLEIK            | IgHV1-81<br>IgcV4-61  |
| M8a-25 | EVQLQQSVAELVLRPGASVVKLSCTASGFNIKNTYMHVWQRP<br>QGLEWIGRIDPDSIDHTRYAPKFKGKAVITAFSTSSNTAYLQLS<br>SLTSEDTAVYYCAREGGGNYPIYYAIDYWGQGTSTVTVSS | DIQMTQSSSSFSVSLGDRVTITCKASEDIYIRLAWYQQRP<br>APRLIISNAISLETGVPDRFSGSGFGKDHDTLSTLQTEDVA<br>TYCCQQYWSPTWTFGGGKLEIK          | IgHV14-3<br>IgcV13-84 |
| M8a-28 | QVQLQQPGAELVLRPGASVKMSCKASGYNFNHYWISWVQRPG<br>QGLEWIGDIYPLSHFTTYNEKFTNRATLTVDTSSSTAYMQLN<br>SLTSDSAVYYCARWDYFDSRTFDYWGQGTTLTVSS        | DILLTQFPAILSVSPGERVFSFCRASQTIGTNIHWYQQRING<br>SPRLIKYASESISGIPSRFSGSGSGTDFSLSINNVEEDIA<br>DYCCQQINSWPLTFGAGTKLDLK        | IgHV1-55<br>IgcV5-48  |
| M8a-29 | EVQLQQSVAELVLRPGASVVKLSCTASGFNIKNTYMHVWQRP<br>QGLEWIGRIDPDSIDHTRYAPKFKGKAVITAFSTSSNTAYLQLS<br>SLTSEDTAVYYCAREGGGNYPIYYAIDYWGQGTSTVTVSS | DIVMTQAAFNPVTLGTSASISCRSTKSLLSNGITYLYWYL<br>KQPGQSPQLLIYQMSNLAGVPRFSSSGSGTDFTLRISRVE<br>AEDVGVYCAQNLPLPYTFGGGKLEIK       | IgHV14-3<br>IgcV2-109 |
| M8a-30 | QVHLQQSGPELVKPGASVKISCKASGYGFSWMMNWKQRP<br>KLEWIGRIYPGDGTNYNDKFKGKATLTADRSSSTAYMHLT<br>SLTSADSAVYYFCARSLLYSFDYWGQGTTLTVSS              | DVVVTQTPPLSLPVSGDQVSIISCRSSQSLAGSYGHTYLSWYL<br>HKSGQSPQLLIYGISNRFSGVPRFSGSGSGTDFTLKISTIK<br>PEDLGMYYCQGHQPLTFGAGTKLELK   | IgHV1-82<br>IgcV1-88  |
| M8a-31 | EVQLKQSAELVLRPGASVKVSTASGFNIKNIYMHVWQRP<br>QGLDWIGRIDPANGNSRYAPKFKGKATITADTSSNTAYLQLS<br>SLTSEDTAVYYCADEGWGFANWGQGTTLTVSA              | DIVMTQSPSSLTVTAGEKVTMSCKSSQSLNSGNQKNYLTWY<br>QKQVGPQPKLLIYWASTRDPGVPDRFTGSGFGTDFTLTISSV<br>QAEDLAVYYCQNDYSYPLTFGAGTKVELK | IgHV14-3<br>IgcV8-19  |
| M8a-34 | QVQLQQPGAELVLRPGASVKMSCKASGYTFITYWITWVQRPG<br>QGLEWIGDIYPPGGRTNYNEKFKSKATLTVDTSSSTAYMQLR<br>SLTSEDSAVYYCARYDGNVYGYYYAMDYWGQGTSTVTVSS   | DIVLTQSPVSLAVSLGQRATISCRASESVDFYGNFSYIYWYQQ<br>KPGQAPKLLIYRANLESGIPARFSGSGSRTDFTLTIHPVEA<br>DDVATYYCQQSIEDPRTFGGGKLEIK   | IgHV1-55<br>IgcV3-5   |
| M8a-36 | QVQLQQTGAELVLRPGASVKMSCKASGYTFYSYIHWKVRPG<br>QGLEWIGDIYPPGGSTNYNEKFKSKATLTVDTSSSTAYMQLS<br>SLTSEDSAVYYCTRGGSRFAMDYWGQGTSTVTVSS         | DIVMTQAAPVPTPGESVSIISCRSSKSLLSNGNTYLYWFL<br>QRPQSPQLLIYRMSNLAGVPRFSGSGSSTAFTLRI SRVE<br>AEDVGVYCMQHLEYPYTFGGGKLEIK       | IgHV1-55<br>IgcV2-137 |
| HSW-1  | QVQLQQPGAELVLRPGTSMKLSCKASGYTFYSYIHWVWQRP<br>QGLEWIGMIHPNSGSKTYNENFKSKATLTVDKSSSTAYMQLS<br>SLTSEDSAVYYCVRSGSYGTYDYFDYWGQGTTLTVSS       | DIVLTQSPASLAVSLGQRATISCRASESVNIYGNFSFMHWYQQ<br>KPGQPPKLLIFRANLESGIPVRFSGSGSRTDFTLTIHPVEA<br>DDVATYYCHQSNEDPFTFSGGKLEIK   | IgHV1-64<br>IgcV3-5   |
| HSW-2  | QVQLQQSGPELVKPGASVKISCKASGYVFTSWMVWVQRPG<br>EGPEWIGRIYPRDGHSSSTGKFKDKATLTADKSSNTAYIHL<br>SLTSEDSAVYYFCARDYGYYYFDYWGQGTTLTVSS           | DIQMTQSPASLSASVGEAVTITCRLENSVYFLAWYQQKQK<br>SPQLLVYRAKTLAEGVPSRFSGSGSGTQFSLKINSLQPEDFG<br>TYCCQHHYGTPTFGGGKLEIK          | IgHV1-82<br>IgcV12-44 |

**Table S1. Sequences and V gene segment lineages for 16 mAbs identified as binding at least one RBD during screening. Related to Figure 2. M8a-9 and M8a-36 did not exhibit binding to purified RBDs by ELISA (data not shown). M8a-11 and M8a-26 are identical sequences.**

| Structures                               | WA1 spike in complex with |             |             |             |             |             |               | Omicron BA.1 spike in complex with M8a-31 Fab |
|------------------------------------------|---------------------------|-------------|-------------|-------------|-------------|-------------|---------------|-----------------------------------------------|
|                                          | M8a-3 Fab                 | M8a-6 Fab   | M8a-28 Fab  | M8a-31 Fab  | M8a-34 Fab  | HSW-1 Fab   | HSW-2 Fab     |                                               |
| <b>Data Collection and processing</b>    |                           |             |             |             |             |             |               |                                               |
| Microscope                               | Titan Krios               | Titan Krios | Titan Krios | Titan Krios | Titan Krios | Titan Krios | Talos Arctica | Titan Krios                                   |
| Camera                                   | Gatan K3                  | Gatan K3    | Gatan K3    | Gatan K3    | Gatan K3    | Gatan K3    | Gatan K3      | Gatan K3                                      |
| Magnification                            | 105,000                   | 105,000     | 105,000     | 105,000     | 105,000     | 105,000     | 45,000        | 105,000                                       |
| Voltage (keV)                            | 300                       | 300         | 300         | 300         | 300         | 300         | 200           | 300                                           |
| Exposure (e/Å <sup>2</sup> )             | 60                        | 60          | 60          | 60          | 60          | 60          | 60            | 60                                            |
| Pixel size (Å)                           | 0.832                     | 0.832       | 0.832       | 0.832       | 0.832       | 0.832       | 0.869         | 0.832                                         |
| Defocus Range (µm)                       | -1 to -3                  | -1 to -3    | -1 to -3    | -1 to -3    | -1 to -3    | -1 to -3    | -1 to -3      | -1 to -3                                      |
| Initial Particle Image (no.)             | 1,026,209                 | 842,602     | 964,614     | 670,746     | 1,186,807   | 1,713,001   | 449,736       | 1,689,653                                     |
| Final Particle Image (no.)               | 272,779                   | 159,604     | 332,106     | 295,711     | 421,879     | 336,288     | 43,362        | 142,452                                       |
| Symmetry Imposed                         | C1                        | C1          | C3          | C3          | C1          | C1          | C1            | C3                                            |
| Map Resolution (Å)                       | 3.1                       | 3.2         | 2.8         | 2.9         | 3.5         | 3.1         | 4.1           | 3.1                                           |
| FSC Threshold                            | 0.143                     | 0.143       | 0.143       | 0.143       | 0.143       | 0.143       | 0.143         | 0.143                                         |
| Map Resolution Range (Å)                 | 3.0 - 3.5                 | 3.1 - 3.5   | 2.7 to 3.1  | 2.9 - 3.2   | 3.5 - 4.3   | 3.0 to 3.4  | 3.9 - 4.3     | 2.9 - 3.3                                     |
| <b>Refinement</b>                        |                           |             |             |             |             |             |               |                                               |
| Initial Model Used                       | PDB 7SC1                  | PDB 7SC1    | PDB 7SC1    | PDB 7SC1    | PDB 7SC1    | PDB 7SC1    | PDB 7SC1      | PDB 7SC1                                      |
| Model Resolution (Å)                     | 3.1                       | 3.2         | 2.8         | 2.9         | 3.5         | 3.1         | 4.1           | 3.1                                           |
| FSC Threshold                            | 0.143                     | 0.143       | 0.143       | 0.143       | 0.143       | 0.143       | 0.143         | 0.143                                         |
| <b>Model composition</b>                 |                           |             |             |             |             |             |               |                                               |
| non-hydrogen atoms                       | 30,762                    | 27,051      | 30,942      | 30,552      | 30,669      | 26,992      | 8,392         | 30,075                                        |
| protein residues                         | 3,867                     | 3,397       | 3,906       | 3,861       | 3,873       | 3,409       | 1,077         | 3,801                                         |
| ligands                                  | 51                        | 48          | 39          | 45          | 42          | 38          | 4             | 33                                            |
| <b>Average B-factors (Å<sup>2</sup>)</b> |                           |             |             |             |             |             |               |                                               |
| protein                                  | 135.2                     | 157.5       | 110.4       | 130.4       | 205.7       | 158.8       | 197.9         | 92.4                                          |
| ligands                                  | 116.3                     | 139.9       | 96.8        | 111.6       | 167.3       | 143.6       | 213.5         | 82.5                                          |
| <b>R.m.s. deviations</b>                 |                           |             |             |             |             |             |               |                                               |
| Bond length (Å)                          | 0.005                     | 0.004       | 0.003       | 0.004       | 0.003       | 0.004       | 0.003         | 0.004                                         |
| Bond angles (°)                          | 0.562                     | 0.582       | 0.536       | 0.572       | 0.586       | 0.593       | 0.589         | 0.594                                         |
| <b>Validation</b>                        |                           |             |             |             |             |             |               |                                               |
| MolProbity score                         | 1.85                      | 1.63        | 1.74        | 1.72        | 1.75        | 1.83        | 1.9           | 1.77                                          |
| Clashscore                               | 10.3                      | 9.4         | 9.5         | 9.1         | 11.1        | 12.3        | 14.6          | 10.8                                          |
| Rotamer outliers                         | 0.06                      | 0.07        | 0.03        | 0           | 0.03        | 0           | 0             | 0.06                                          |
| <b>Ramachandran plot</b>                 |                           |             |             |             |             |             |               |                                               |
| Ramachandran favored (%)                 | 95.4                      | 97.3        | 96.4        | 96.5        | 96.9        | 96.5        | 96.4          | 96.6                                          |
| Ramachandran allowed (%)                 | 4.6                       | 2.7         | 3.6         | 3.5         | 3.1         | 3.5         | 3.6           | 3.4                                           |
| Ramachandran outliers (%)                | 0                         | 0           | 0           | 0           | 0           | 0           | 0             | 0                                             |
| PDB ID                                   | 7UZ4                      | 7UZ5        | 7UZ6        | 7UZ7        | 7UZ9        | 7UZA        | 7UZB          | 7UZ8                                          |

**Table S2. Single-particle cryo-EM data collection, processing, and refinement. Related to Figure 3 and 4.**



| Structures                           | SARS-CoV-2 RBD + M8a-34 Fab | SARS-CoV-2 RBD + HSW-2 Fab       |
|--------------------------------------|-----------------------------|----------------------------------|
| Wavelength (Å)                       | 0.97946                     | 0.97946                          |
| Resolution range (Å)                 | 39.23 - 2.2 (2.279 - 2.2)   | 39.08 - 3.0 (3.108 - 3.0)        |
| Space group                          | P2 <sub>1</sub>             | P4 <sub>3</sub> 2 <sub>1</sub> 2 |
| Unit cell (Å, °)                     | 54.5 165.2 93.7 90 106.6 90 | 123.6 123.6 145.6 90 90 90       |
| Total reflections (no.)              | 553,434 (52,800)            | 592,837 (59,309)                 |
| Unique reflections (no.)             | 79,107 (7,859)              | 23,174 (2,178)                   |
| Multiplicity                         | 7.0 (6.7)                   | 25.6 (26.2)                      |
| Completeness (%)                     | 98.5 (97.9)                 | 99.5 (96.1)                      |
| Mean I/sigma(I)                      | 12.2 (1.24)                 | 19.6 (2.6)                       |
| Wilson B-factor (Å <sup>2</sup> )    | 41.4                        | 81.1                             |
| R-merge                              | 0.105 (1.378)               | 0.147 (1.856)                    |
| R-meas                               | 0.113 (1.494)               | 0.150 (1.893)                    |
| R-pim                                | 0.0425 (0.568)              | 0.030 (0.366)                    |
| CC1/2                                | 0.998 (0.642)               | 0.999 (0.842)                    |
| CC*                                  | 1 (0.884)                   | 1 (0.956)                        |
| Reflections used in refinement (no.) | 79,082 (7,845)              | 23,082 (2,178)                   |
| Reflections used for R-free (no.)    | 1,997 (195)                 | 1,155 (109)                      |
| R-work                               | 0.171 (0.270)               | 0.230 (0.360)                    |
| R-free                               | 0.243 (0.329)               | 0.271 (0.458)                    |
| CC (work)                            | 0.971 (0.821)               | 0.899 (0.834)                    |
| CC (free)                            | 0.962 (0.771)               | 0.604 (0.753)                    |
| Number of non-hydrogen atoms         | 10,482                      | 4,912                            |
| macromolecules                       | 9,884                       | 4,884                            |
| ligands                              | 111                         | 28                               |
| solvent                              | 487                         | 0                                |
| Protein residues (no.)               | 1,278                       | 633                              |
| RMS (bonds) (Å)                      | 0.008                       | 0.009                            |
| RMS (angles) (°)                     | 0.98                        | 1.15                             |
| Ramachandran favored (%)             | 97.5                        | 96.3                             |
| Ramachandran allowed (%)             | 2.5                         | 3.7                              |
| Ramachandran outliers (%)            | 0                           | 0                                |
| Rotamer outliers (%)                 | 0.9                         | 0                                |
| Clashscore                           | 2.6                         | 6.1                              |
| Average B-factor (Å <sup>2</sup> )   | 47                          | 73.0                             |
| macromolecules                       | 46.7                        | 72.7                             |
| ligands                              | 85.0                        | 118.3                            |
| solvent                              | 44.3                        | -                                |
| PDB ID                               | 7UZC                        | 7UZD                             |

**Table S3. X-ray crystallography data collection, processing, and refinement. Related to Figure 3 and 4.**

## References

- Barnes, C.O., Jette, C.A., Abernathy, M.E., Dam, K.A., Esswein, S.R., Gristick, H.B., Malyutin, A.G., Sharaf, N.G., Huey-Tubman, K.E., Lee, Y.E., *et al.* (2020). SARS-CoV-2 neutralizing antibody structures inform therapeutic strategies. *Nature* 588, 682-687.
- Krissinel, E., and Henrick, K. (2007). Inference of macromolecular assemblies from crystalline state. *J Mol Biol* 372, 774-797.
- Lefranc, M.P., Giudicelli, V., Duroux, P., Jabado-Michaloud, J., Folch, G., Aouinti, S., Carillon, E., Duvergey, H., Houles, A., Paysan-Lafosse, T., *et al.* (2015). IMGT(R), the international ImMunoGeneTics information system(R) 25 years on. *Nucleic Acids Res* 43, D413-422.
