# Supplementary material
Source: PubMed Central journal article supplement (PMC9767678)
Supplement: mmc2.pdf [file mmc2.pdf]

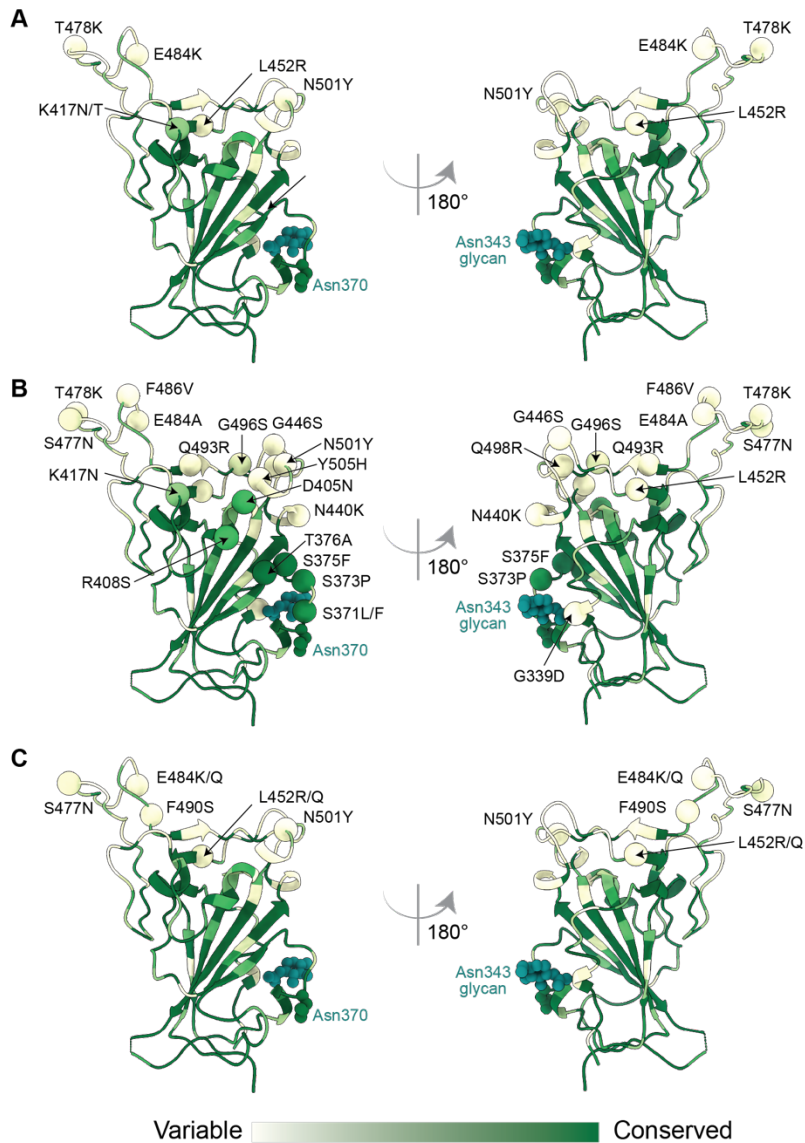

**RBD VOC and VOI substitutions. Related to Figure 1.** Locations of RBD substitutions in VOCs and VOIs (<https://viralzone.expasy.org/9556>) are shown as spheres colored according to a variability gradient (bottom) on the WA1 RBD structure (PDB 7BZ5). The N-linked glycan at position 343 of SARS-CoV-2 RBD is shown as teal spheres, and a potential N-linked glycosylation site at position 370 (SARS-CoV-2 numbering) that is found in sarbecovirus RBDs but not in the SARS-CoV-2 RBD is also shown in spheres. **(A)** SARS-CoV-2 Alpha, Beta, Gamma and Delta variants. **(B)** SARS-CoV-2 Omicron BA.1, BA.2, BA.2.12.1, and BA.4/BA.5 variants. **(C)** SARS-CoV-2 VOIs.

**A**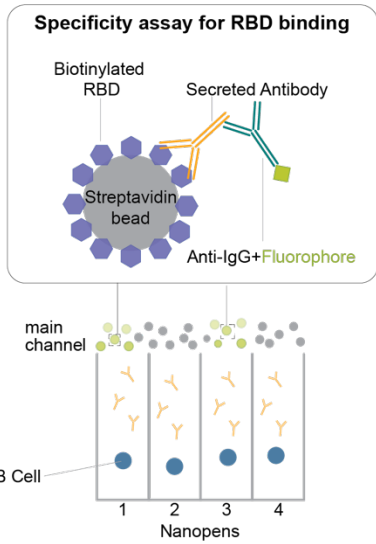

| Loading outcome       | Homotypic SARS-CoV-2 RBD-mi3 immunized mice | percent of chip | Mosaic-8 RBD-mi3 immunized mice | percent of chip |
|-----------------------|---------------------------------------------|-----------------|---------------------------------|-----------------|
| Pens with single cell | 7699                                        | 70.0            | 7747                            | 70.4            |
| Pens with >1 cell     | 1431                                        | 13.0            | 1948                            | 17.7            |
| Total Pens with cells | 9130                                        | 83.0            | 9695                            | 88.1            |

**B**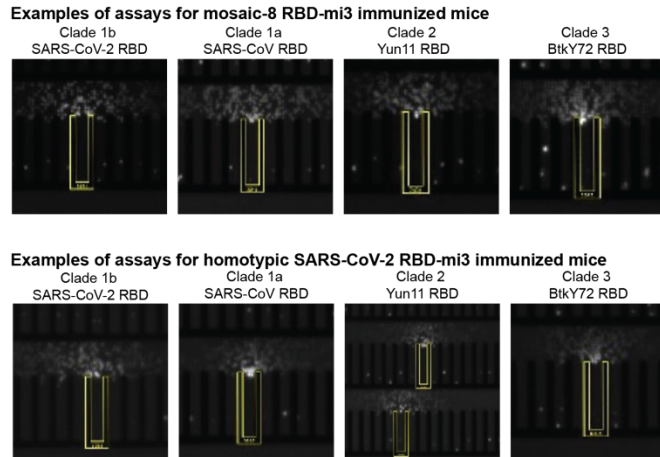**C**

| Assay outcome                          |                                             | Immunization                    |                                             |
|----------------------------------------|---------------------------------------------|---------------------------------|---------------------------------------------|
|                                        |                                             | Mosaic-8 RBD-mi3 immunized mice | Homotypic SARS-CoV-2 RBD-mi3 immunized mice |
| Number of positive Nanopens for 1 RBD  | SARS-CoV-2 RBD                              | 18                              | 130                                         |
|                                        | SARS-CoV RBD                                | 20                              | 47                                          |
|                                        | Yun11 RBD                                   | 24                              | 39                                          |
|                                        | BtKY72 RBD                                  | 9                               | 36                                          |
| Number of positive Nanopens for 2 RBDs | SARS-CoV-2 and SARS-CoV RBDs                | 9                               | 11                                          |
|                                        | SARS-CoV-2 and Yun11 RBDs                   | 9                               | 12                                          |
|                                        | SARS-CoV-2 and BtKY72 RBDs                  | 6                               | 9                                           |
|                                        | SARS-CoV and Yun11 RBDs                     | 7                               | 7                                           |
|                                        | SARS-CoV and BtKY72 RBDs                    | 7                               | 14                                          |
|                                        | Yun11 and BtKY72 RBDs                       | 5                               | 17                                          |
| Number of positive Nanopens for 3 RBDs | All but SARS-CoV RBD                        | 0                               | 3                                           |
|                                        | All but Yun11 RBD                           | 2                               | 3                                           |
|                                        | All but BtKY72 RBD                          | 1                               | 1                                           |
|                                        | All but SARS-CoV-2 RBD                      | 0                               | 2                                           |
| Number of positive Nanopens for 4 RBDs | SARS-CoV-2, SARS-CoV, Yun11 and BtKY72 RBDs | 5                               | 3                                           |

**Beacon setup. Related to Figure 2 and STAR methods.** Individual plasma cells were isolated, cultured, and assayed for RBD binding activities using the Beacon optofluidic system. (A) Antigen-specific binding activity was assayed using biotinylated RBDs immobilized on streptavidin-coated beads and loaded into the main channel of the Beacon microfluidic chip, which contained single plasma B cells in individual culture compartments (Nanopens). The specificity of secreted antibodies for the antigen presented in the channel was detected via the local concentration of a fluorescently-labeled secondary above a Nanopen secreting an antigen-specific antibody. (B) Examples of detection of secreted antibody binding to different RBDs. The Nanopen(s) from which the secreted antibody signal was emanating over the assay time course is indicated in yellow. (C) Summary of cross-reactive antigen-specificity assay results.

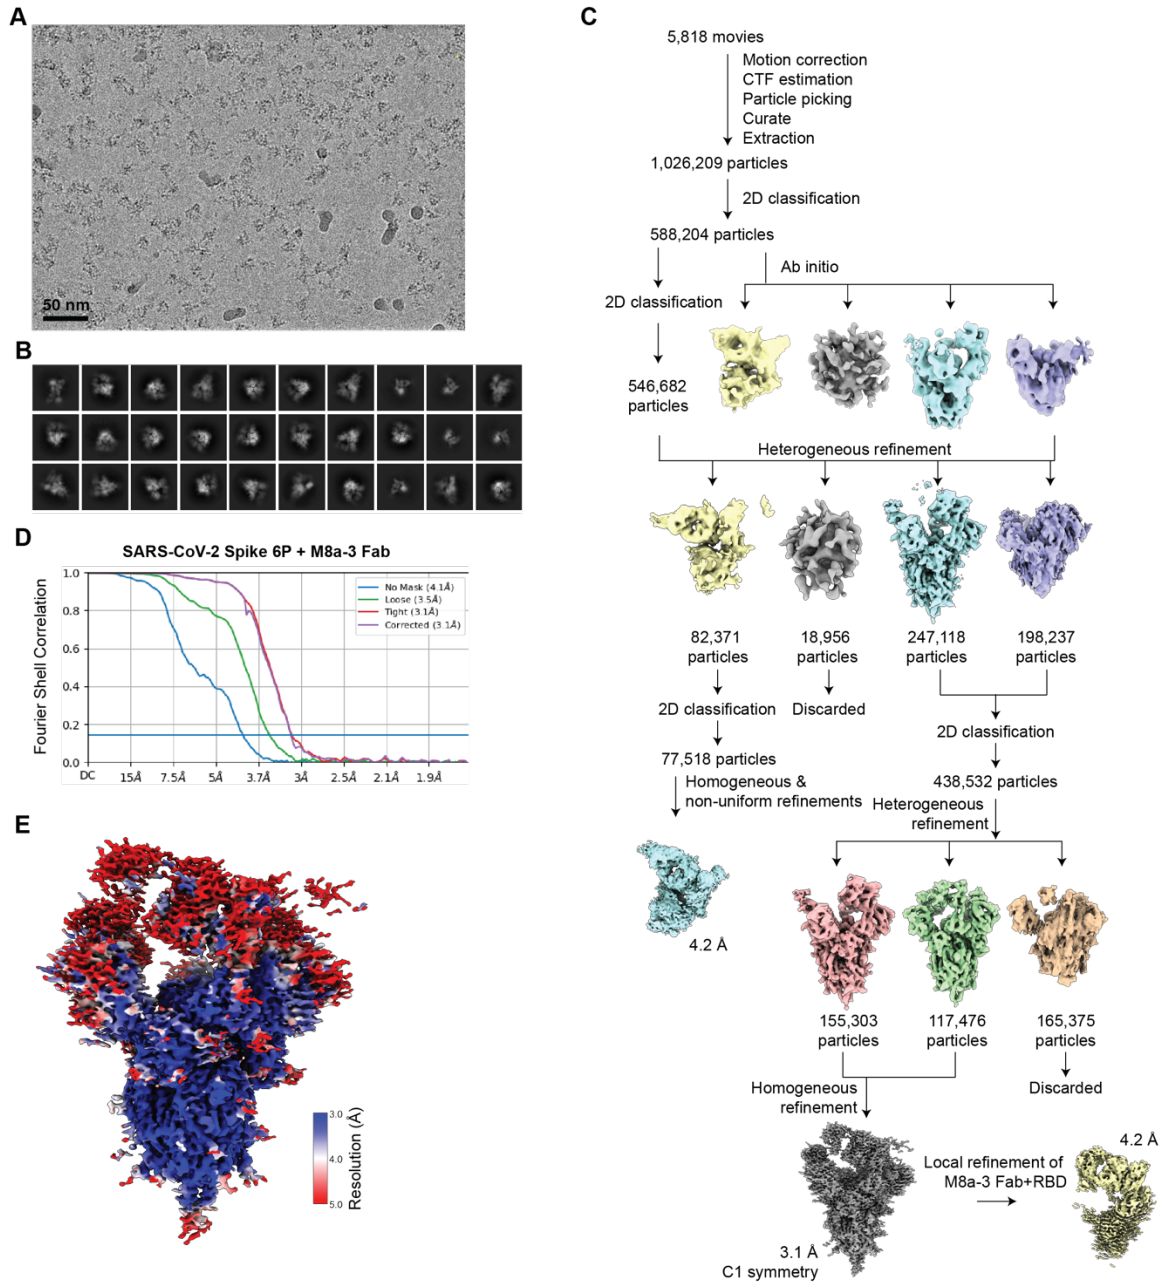

**Cryo-EM data processing and validation for of M8a-3 Fab in complex with SARS-CoV-2 WA1 spike. Related to Figure 3. (A) Representative micrograph. The scale bar represents 50 nm. (B) Representative 2D classes. (C) Workflow of single-particle data processing. (D) Fourier shell correlation (FSC) plot of the final reconstruction. (E) Final reconstruction of M8a-3 Fab in complex with SARS-CoV-2 spike, colored by local resolution.**

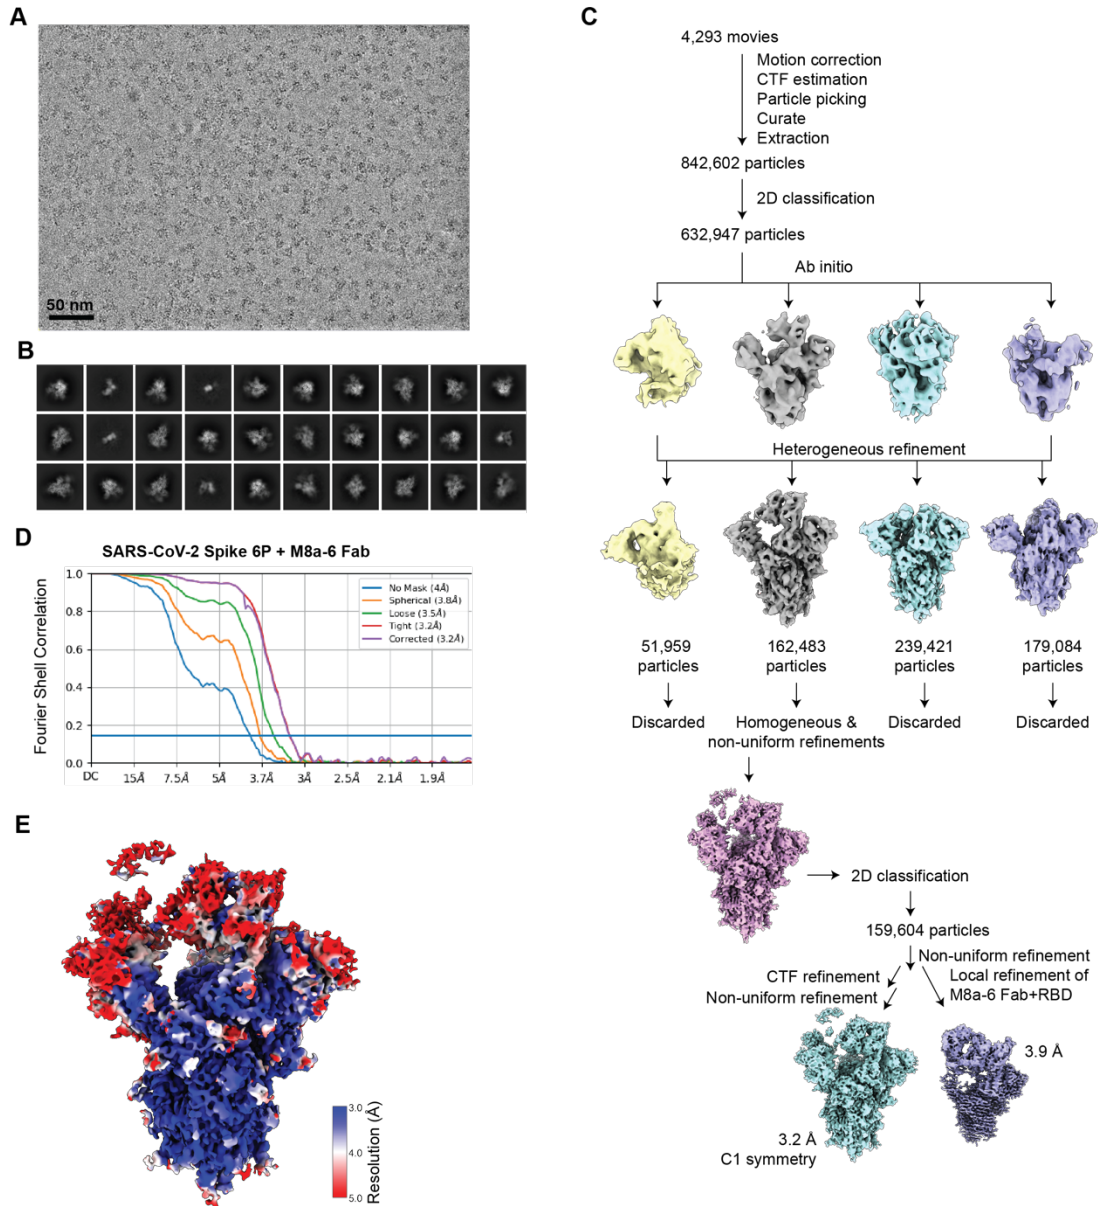

**Cryo-EM data processing and validation for M8a-6 Fab in complex with SARS-CoV-2 WA1 spike. Related to Figure 3. (A)** Representative micrograph. The scale bar represents 50 nm. **(B)** Representative 2D classes. **(C)** Workflow of single-particle data processing. **(D)** FSC plot of the final reconstruction. **(E)** Final reconstruction of M8a-6 Fab in complex with SARS-CoV-2 spike, colored by local resolution.

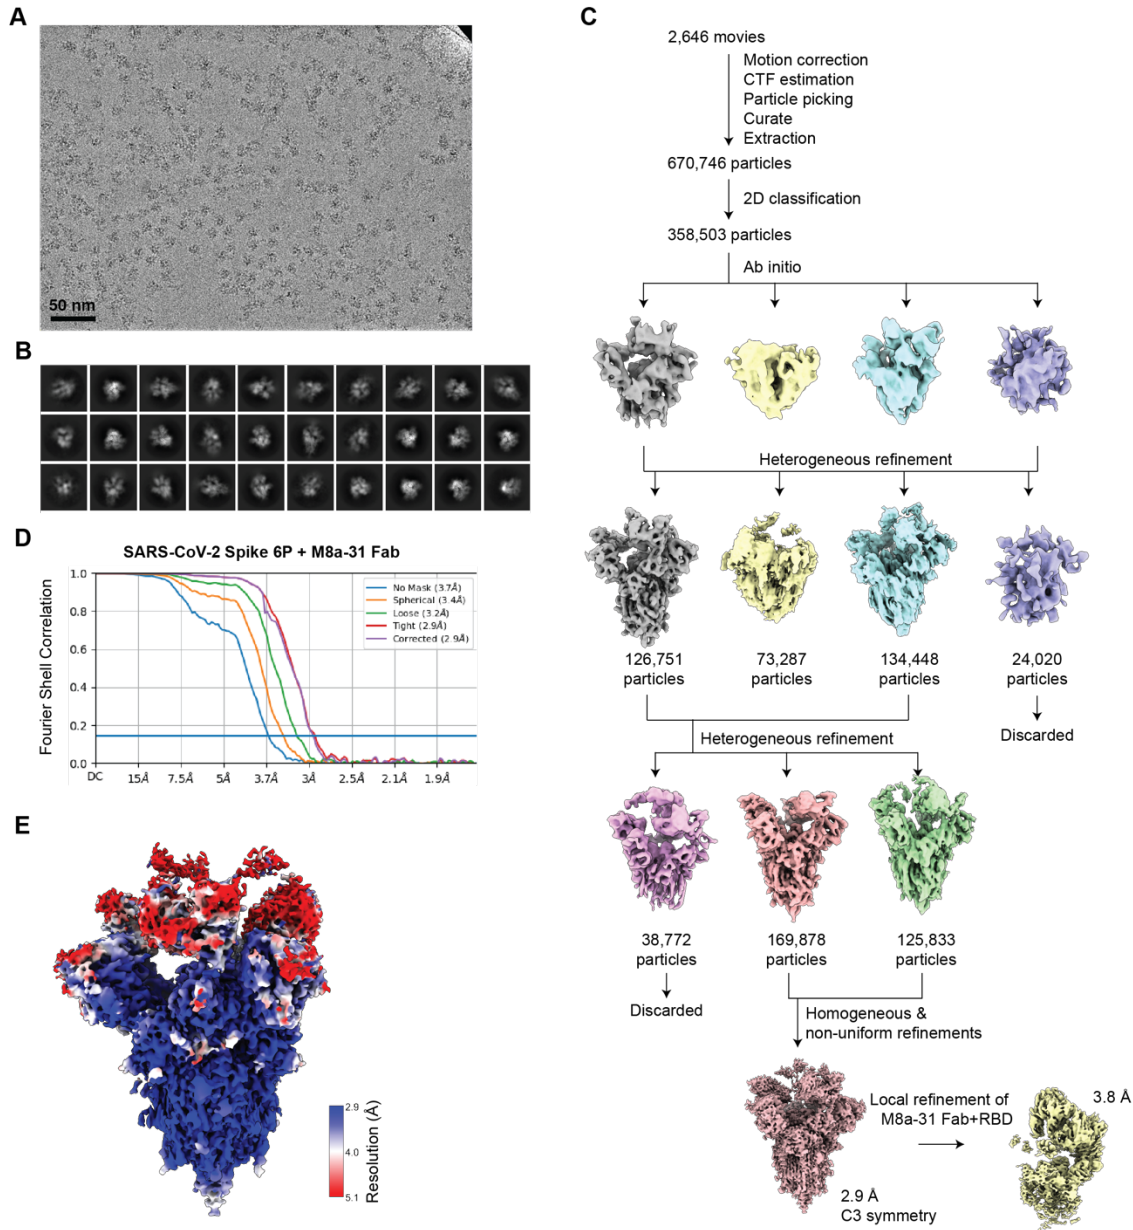

**Cryo-EM data processing and validation for of M8a-31 Fab in complex with SARS-CoV-2 WA1 spike. Related to Figure 3. (A)** Representative micrograph. The scale bar represents 50 nm. **(B)** Representative 2D classes. **(C)** Workflow of single-particle data processing. **(D)** FSC plot of the final reconstruction. **(E)** Final reconstruction of M8a-31 Fab in complex with SARS-CoV-2 spike, colored by local resolution.

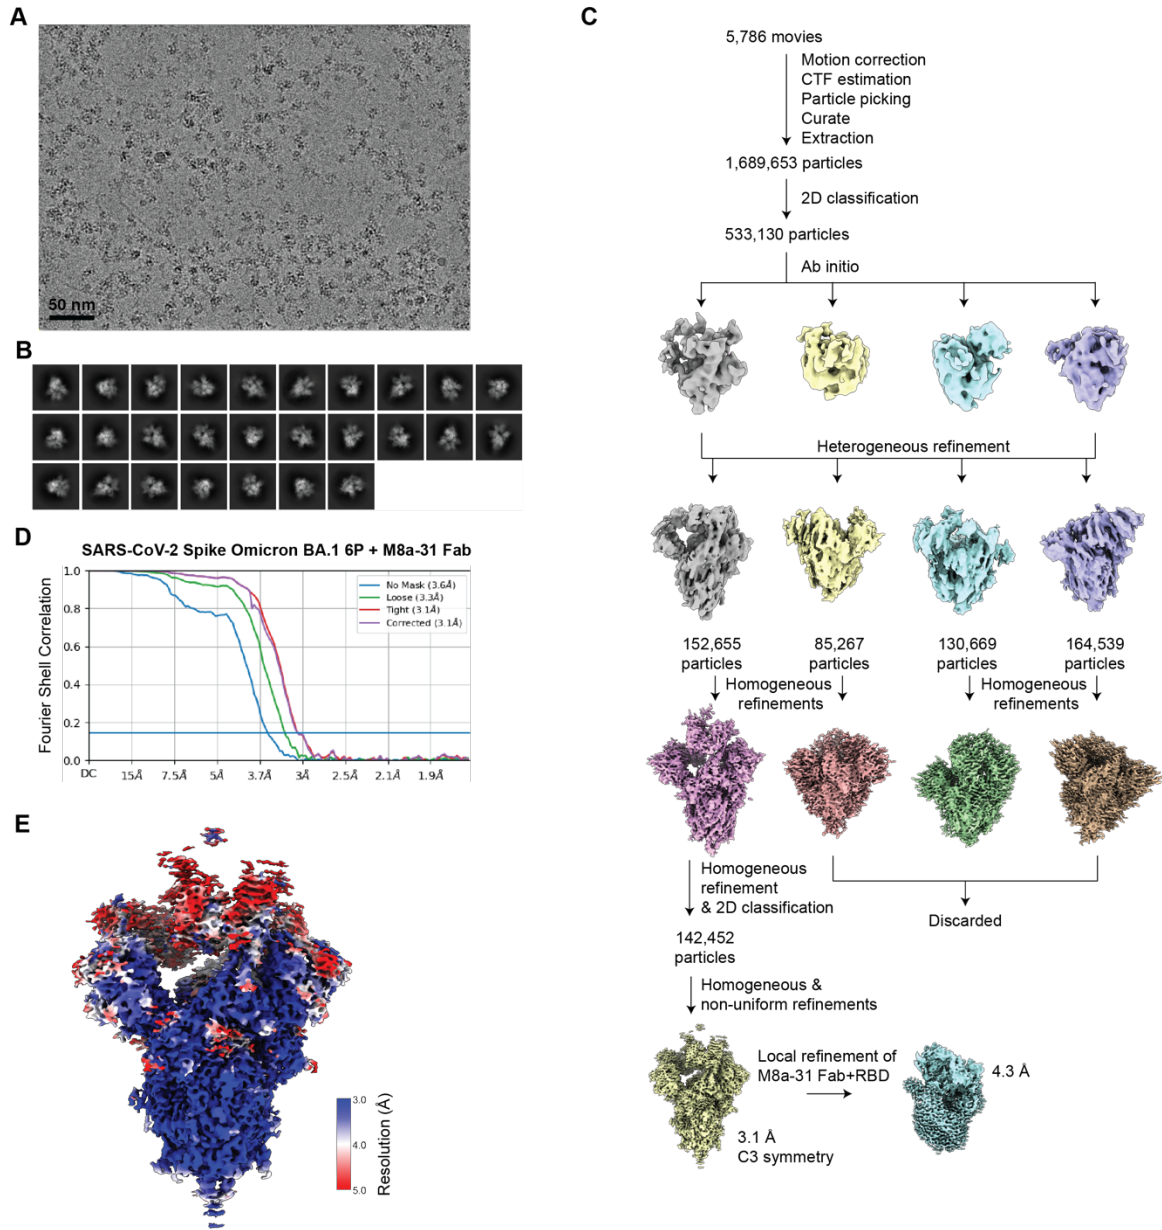

**Cryo-EM data processing and validation for of M8a-31 Fab in complex with SARS-CoV-2 Omicron BA.1 spike. Related to Figure 3. (A) Representative micrograph. The scale bar represents 50 nm. (B) Representative 2D classes. (C) Workflow of single-particle data processing. (D) FSC plot of the final reconstruction. (E) Final reconstruction of M8a-3 Fab in complex with SARS-CoV-2 spike Omicron BA.1, colored by local resolution.**

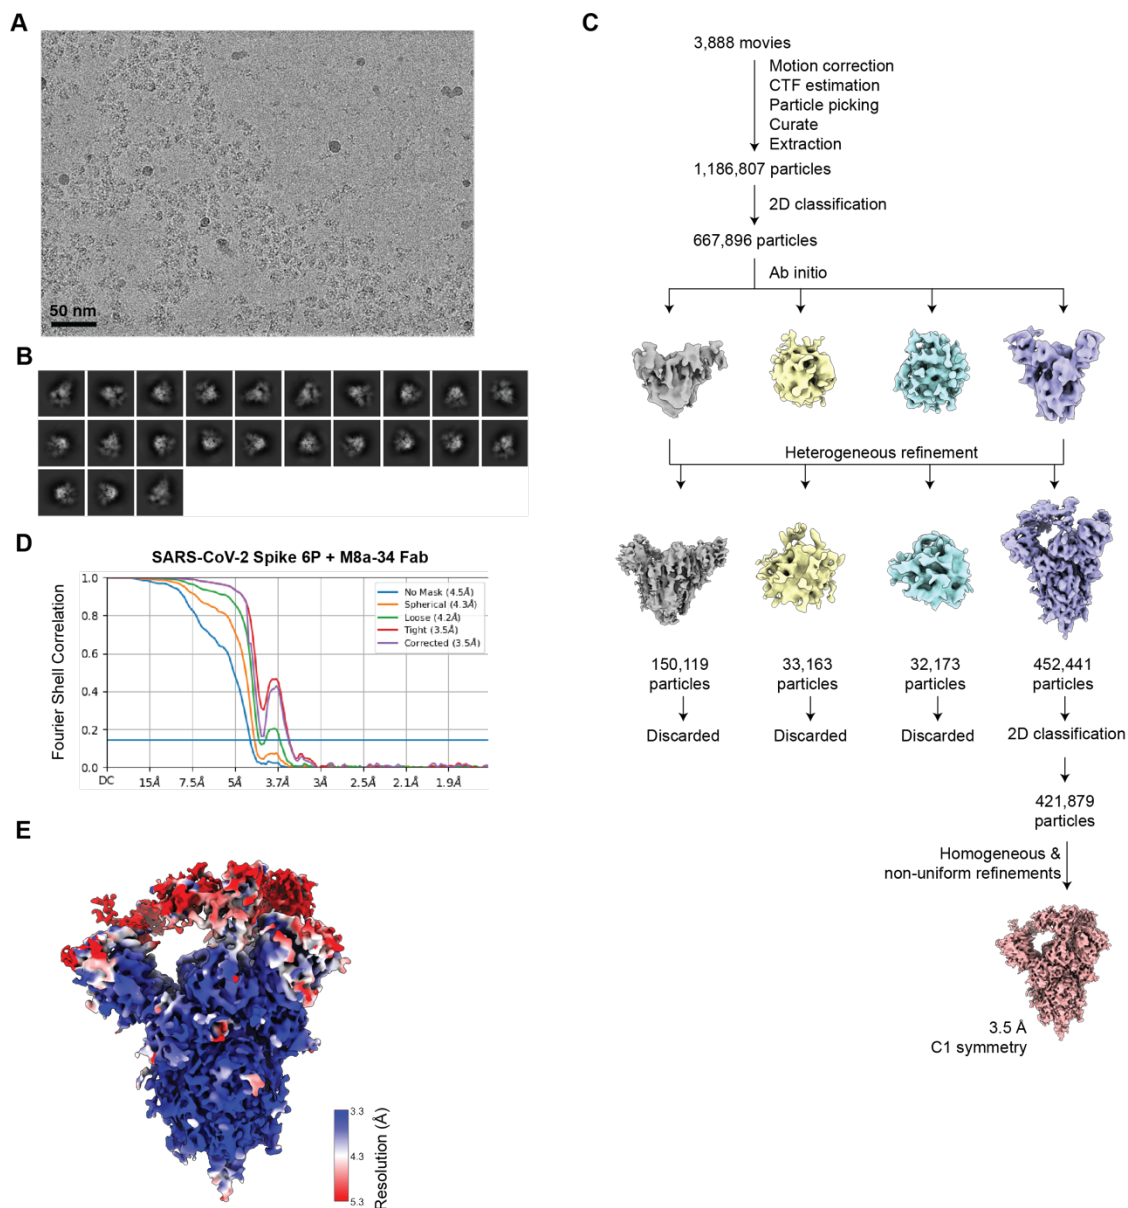

**Cryo-EM data processing and validation for of M8a-34 Fab in complex with SARS-CoV-2 WA1 spike. Related to Figure 3. (A)** Representative micrograph. The scale bar represents 50 nm. **(B)** Representative 2D classes. **(C)** Workflow of single-particle data processing. **(D)** FSC plot of the final reconstruction. **(E)** Final reconstruction of M8a-34 Fab in complex with SARS-CoV-2 spike, colored by local resolution.

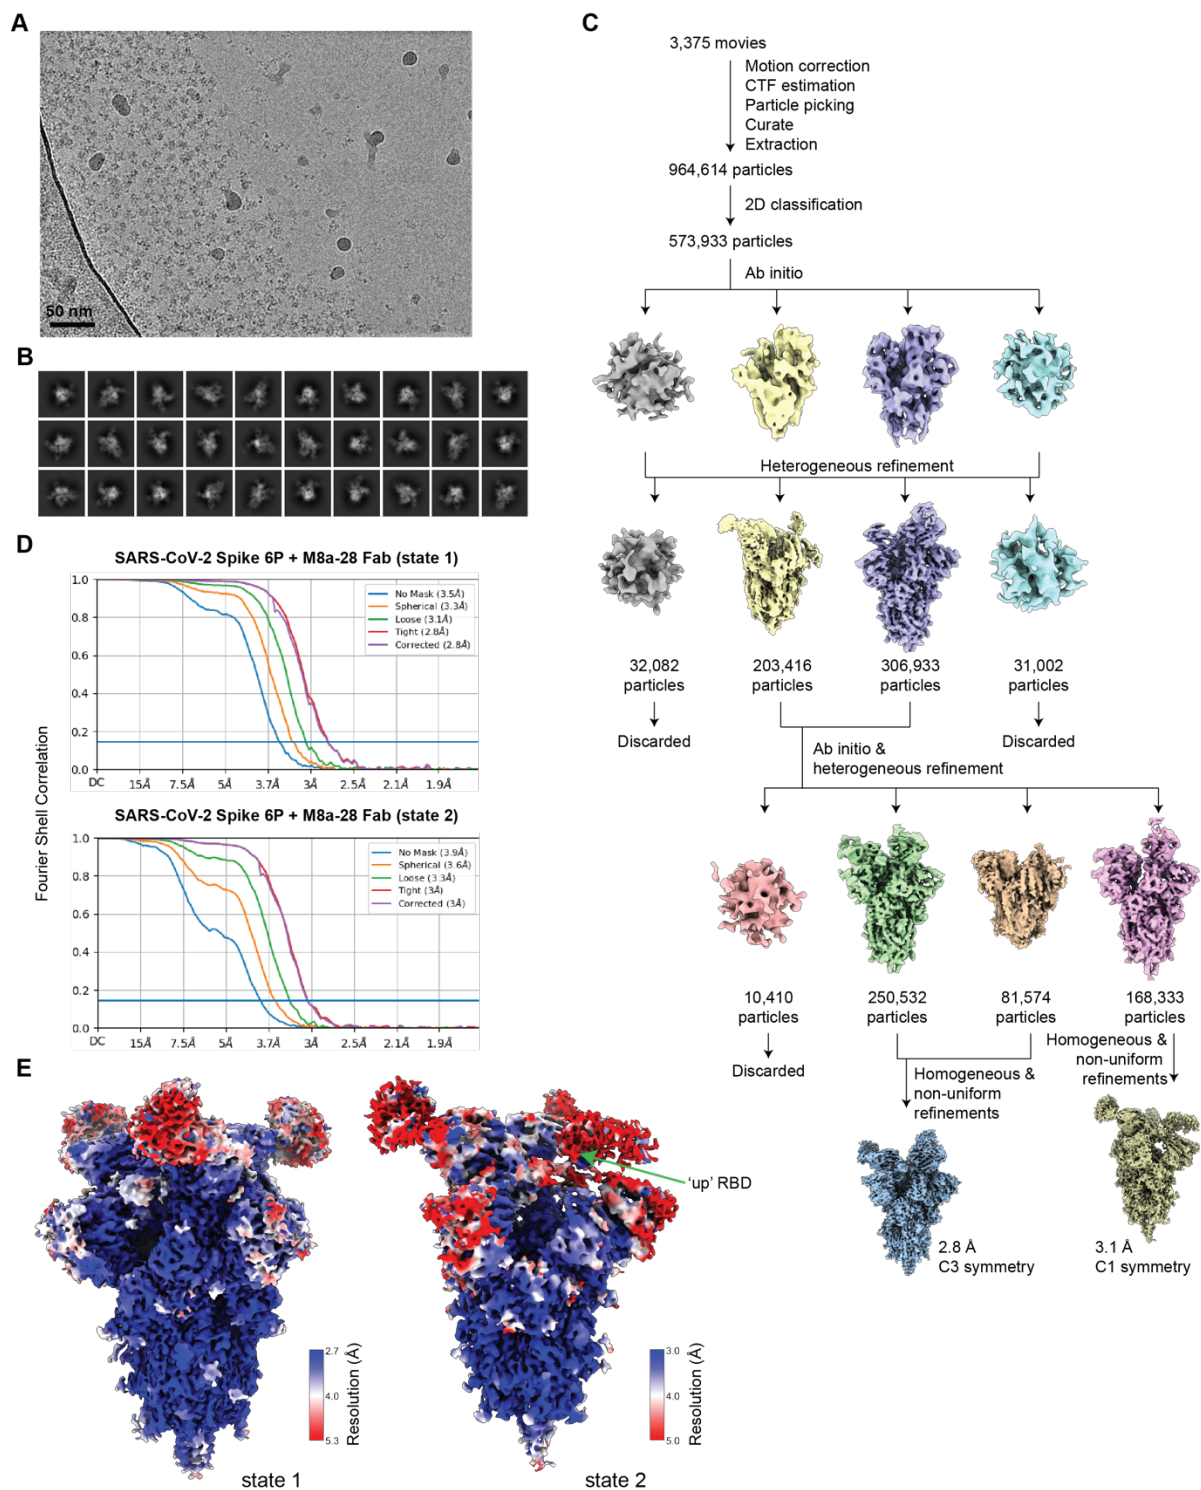

**Cryo-EM data processing and validation for M8a-28 Fab in complex with SARS-CoV-2 WA1 spike. Related to Figure 3. (A)** Representative micrograph. The scale bar represents 50 nm. **(B)** Representative 2D classes. **(C)** Workflow of single-particle data processing. **(D)** FSC plot of the final reconstruction. **(E)** Final reconstructions of both states of M8a-28 Fab in complex with SARS-CoV-2 spike, colored by local resolution. An 'up' RBD in state 2 is labeled with an arrow.



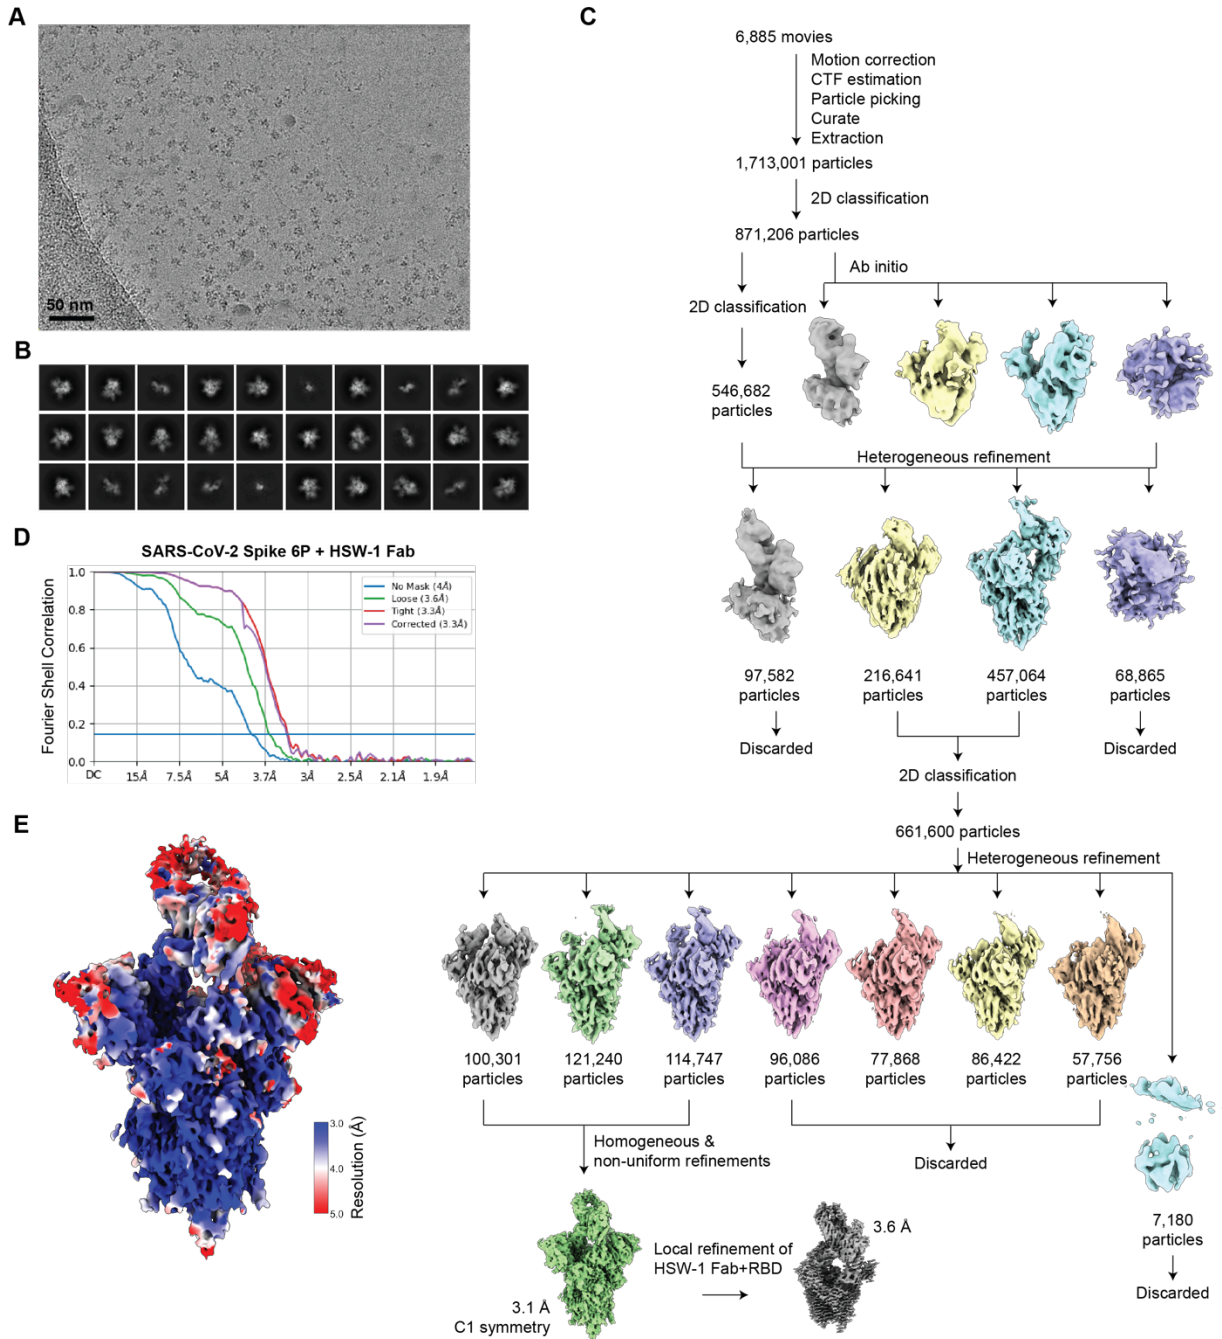

**Cryo-EM data processing and validation for of HSW-1 Fab in complex with SARS-CoV-2 WA1 spike. Related to Figure 4. (A) Representative micrograph. The scale bar represents 50 nm. (B) Representative 2D classes. (C) Workflow of single-particle data processing. (D) FSC plot of the final reconstruction. (E) Final reconstruction of HSW-1 Fab in complex with SARS-CoV-2 spike, color by local resolution.**

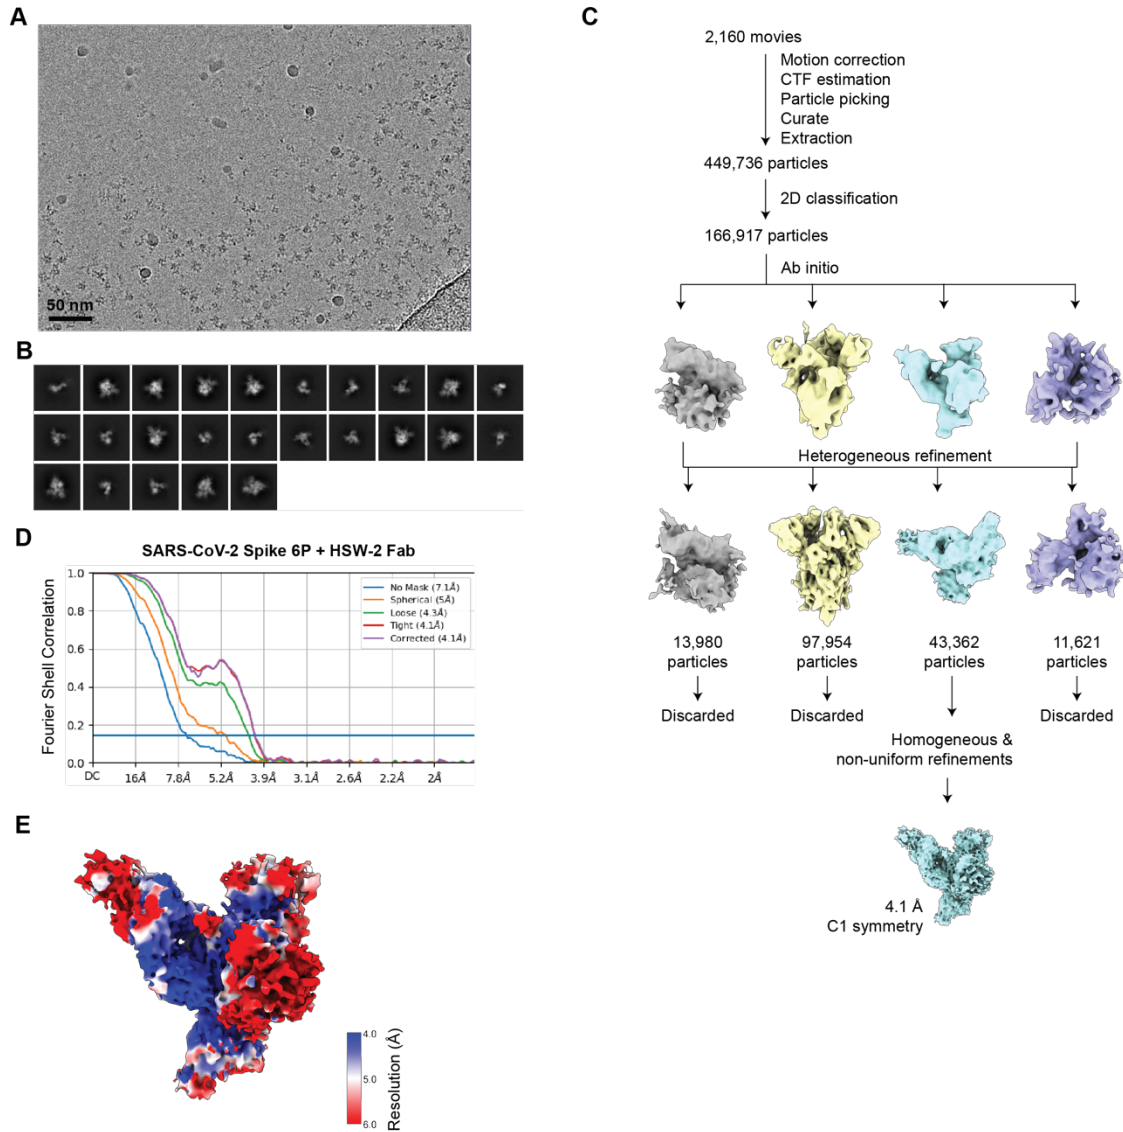

**Cryo-EM data processing and validation for of HSW-2 Fab in complex with SARS-CoV-2 WA1 spike. Related to Figure 4. (A) Representative micrograph. The scale bar represents 50 nm. (B) Representative 2D classes. (C) Workflow of single-particle data processing. (D) FSC plot of the final reconstruction. (E) Final reconstruction of HSW-2 Fab in complex with SARS-CoV-2 spike S1 domain, color by local resolution.**

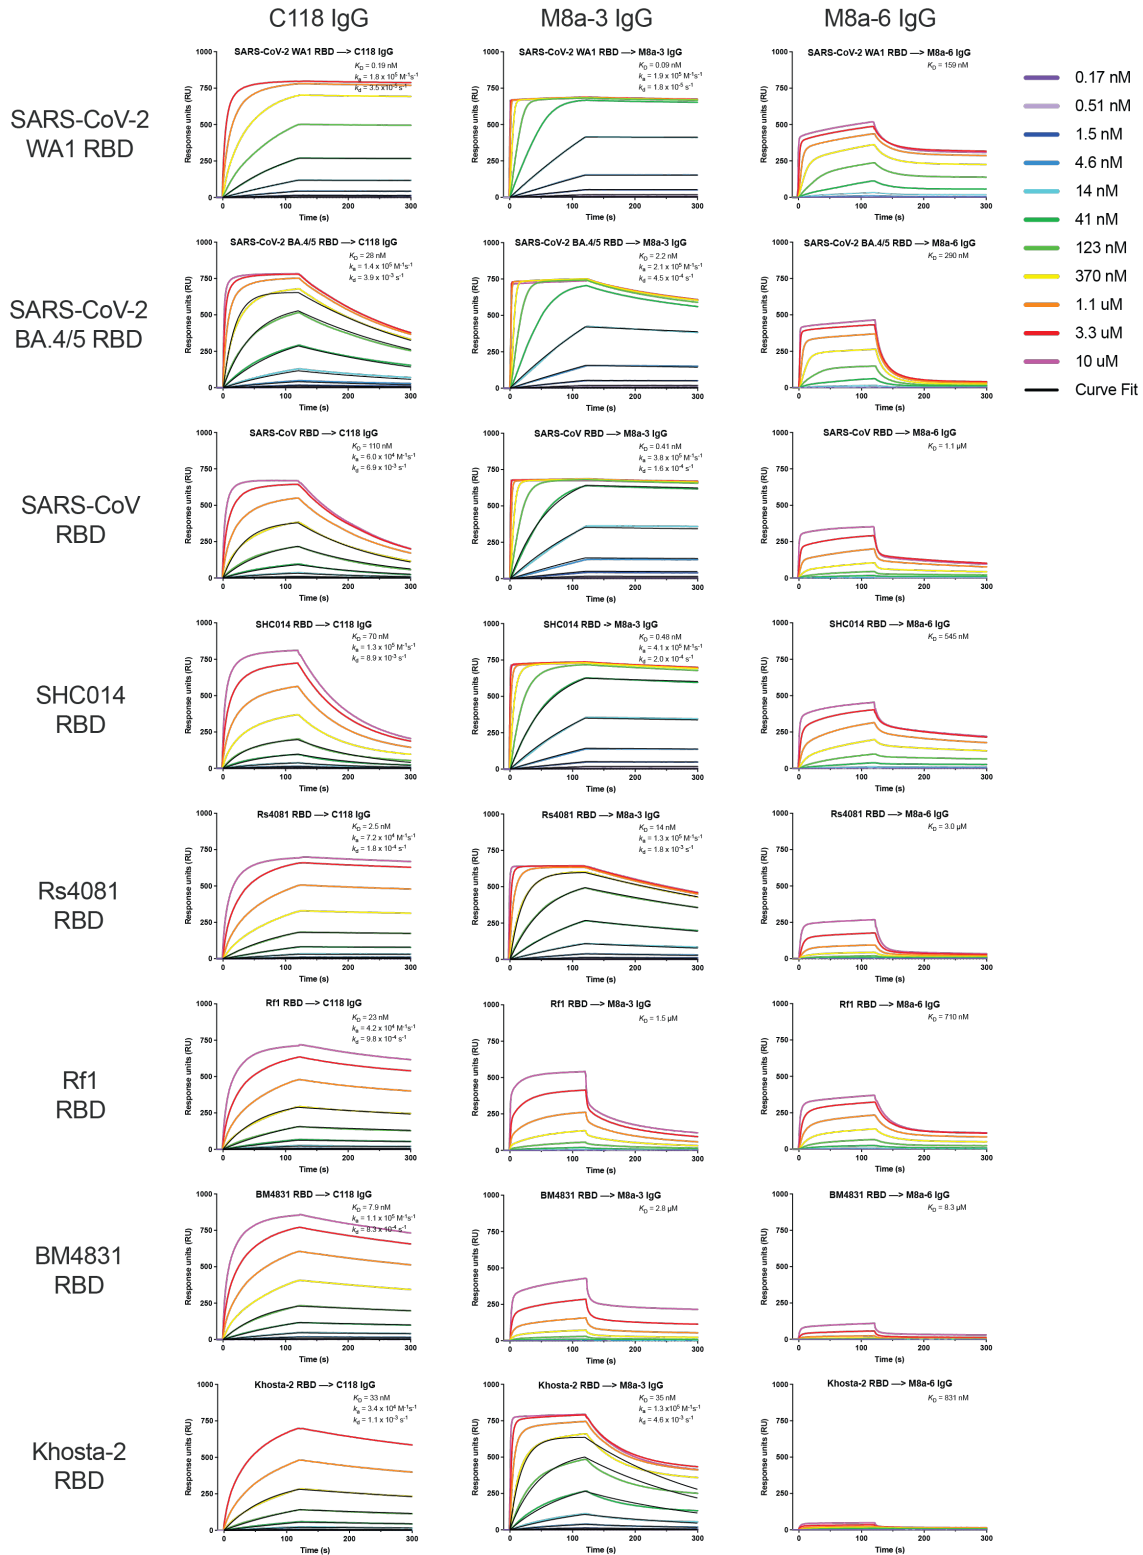

**SPR analyses of RBD binding to C118, M8a-3, and M8a-6. Related to Figure 2.** IgGs were immobilized on biosensor chips and purified RBDs were injected at the indicated concentrations. Individual binding curves (colored lines) were globally fit to a 1:1 binding model (black) when

possible (most curves for C118 and M8a-3). When indicated in the upper right of the C118 and M8a-3 images, kinetic constants ( $k_a$  and  $k_d$ ) were derived from fitting to a 1:1 binding model, and equilibrium constants ( $K_D$  values) were calculated as  $k_d / k_a$ . For binding curves that reached or nearly reached equilibrium,  $K_D$  values were derived from the midpoints of plots of RBD concentration versus maximum RU that were fit to a 1:1 binding model; these are indicated in the upper right of the M8a-3 and M8a-6 images that are listed without kinetic constants.
